# Supplementary material for: The roles of trait and process resilience in relation of BIS/BAS and depressive symptoms among adolescents
Source: PeerJ. 2022 Jul 5;10:e13687. doi: 10.7717/peerj.13687 (PMC9266581; doi:10.7717/peerj.13687)
Supplement: Supplemental Information 1 [file peerj-10-13687-s001.xlsx]

## Sheet: Sheet1
Num	sex	DSRS_Total	BRS_Q_Opt	BRS_Q_Cont	BRS_Q_Soc	BRS_Q_Behv	BRS_A_PrbSlv	BRS_A_SelfUndr	BRS_A_OthUndr	BIBA_BIS	BIBA_BAS_D	BIBA_BAS_R	BIBA_BAS_FS	Trait_Resi	Behav_resi	DSRS1	DSRS2	DSRS3	DSRS4	DSRS5	DSRS6	DSRS7	DSRS8	DSRS9	DSRS10	DSRS11	DSRS12	DSRS13	DSRS14	DSRS15	DSRS16	DSRS17	DSRS18	pd1	pd2	pd3
1	male	10	13	14	13	12	14	13	13	16	14	17	12	52	40	3	3	2	2	3	1	2	3	3	3	2	3	3	2	1	3	1	1	14	16	11
2	male	5	14	13	9	12	14	15	9	16	14	20	11	48	38	3	3	1	2	1	2	3	3	3	1	3	3	3	1	1	2	1	1	12	16	9
3	male	7	13	10	15	12	12	13	12	17.78	16	20	13	50	37	3	2	1	3	2	1	3	3	3	1	3	3	3	2	3	3	1	1	12	16	13
4	male	4	8	5	6	11	8	11	7	19	9	12	9	30	26	3	2	1	3	1	2	3	3	2	1	2	3	3	1	1	2	1	1	12	14	9
5	male	6	5	8	6	6	4	10	5	13	10	12	11	25	19	2	2	1	3	1	2	3	3	2	1	2	2	3	2	1	3	1	1	11	13	11
6	male	15	7	7	13	12	8	11	9	18	8	13	8	39	28	1	2	1	2	1	2	2	2	1	1	2	1	3	1	3	1	1	2	9	9	11
7	male	11	9	9	10	6	11	12	6	12	15	8	6	34	29	2	2	1	3	2	2	3	3	2	2	2	1	2	2	1	2	1	1	12	13	9
8	male	5	13	15	13	8	3	14	11	22	8	14	9	49	28	3	3	1	2	1	1	3	3	3	1	2	2	3	1	1	2	1	1	11	14	9
9	male	23	3	8	3	8	4	7	13	21	4	7	4	22	24	2	2	3	2	3	2	1	2	1	3	2	2	2	2	3	3	3	3	14	11	16
10	male	11	10	7	11	10	12	13	9	20	10	11	10	38	34	2	2	1	2	1	2	2	2	2	1	2	2	3	2	1	2	1	1	10	11	10
11	female	5	15	14	12	15	10	13	14	19	16	20	9	56	37	3	3	1	3	2	2	3	3	2	1	3	3	3	1	1	2	2	1	14	15	10
12	female	12	14	13	9	13	9	8	12	22	14	14	8.55603	49	29	2	2	1	3	1	2	2	2	3	1	2	1	2	2	1	3	1	1	11	11	10
13	female	10	10	11	9	11	7	11	10	17	10.6179	14	9	41	28	2	3	1	2	1	1	2	2	2	2	2	2	3	2	1	2	1	1	10	12	10
14	female	14	11	3	7	7	6	12	6	16	9	17	12.556	28	24	2	1	1	3	2	3	2	2	1	1	3	1	3	1	1	3	3	2	12	10	13
15	female	6	9	14	10	15	13	15	8	21.7785	9	16	9	48	36	3	3	1	3	1	2	3	2	3	1	2	2	3	1	1	3	1	1	13	13	10
16	female	17	12	11	6	8	8	12	7	16	11	14	9	37	27	2	1	1	3	2	2	2	1	3	1	2	2	1	2	1	2	1	1	11	11	8
17	female	2	12	9	11	13	11	13	12	19	11.8346	19	10.8047	45	36	3	2	1	3	1	1	3	3	2	1	2	3	3	1	1	3	1	1	11	14	10
18	female	17	12	12	9	9	7	11	11	19.3309	13	17	8	42	29	2	1	1	3	2	3	2	2	1	1	1	2	2	3	1	1	1	3	12	9	11
19	male	6	12	9	9	11	6	7	10	13	5	16	10	41	23	2	2	1	3	1	1	3	3	3	1	1	2	2	1	1	3	1	1	10	13	9
20	male	8	10	14	12	11	5	5	12	14	10	17	12	47	22	3	2	1	3	1	2	3	2	3	1	2	2	2	1	1	3	1	1	12	13	9
21	male	6	12	9	11	12	14	15	8	20	7	14	6	44	37	3	3	2	3	1	1	3	3	3	1	2	2	3	1	1	2	2	1	13	14	10
22	male	23	11	11	8	8	9	11	7	14	11	15	8	38	27	1	2	1	2	2	2	1	1	3	1	1	1	1	2	2	2	2	2	10	8	11
23	male	15.3719	9	8	7	7	9	10	10	23	10	19	14	31	29	2	2	2	3	2	2	3	3	3	1.37194	2	2	2	2	3	2	2	2	13	14.3719	13
24	male	14	12	11	13	12	7	10	12.3103	18	15	17	16	48	29.3103	2	3	1	2	3	2	2	2	3	1	2	2	2	2	1	2	1	1	13	12	9
25	male	14	12	11	12	13	7	11	3	23	16	20	13	48	21	3	2	1	2	2	2	3	3	3	1	2	2	1	1	2	1	2	2	12	14	9
26	male	14	12	14	10	11	9	10	9	21	12	15	10	47	28	2	2	1	3	2	1	3	2	3	2	2	2	2	1	3	2	1	2	11	14	11
27	male	24	3	3	3	3	3	11	3	7	4	5	4	12	17	1	1	1	1	1	1	1	1	1	3	1	1	3	3	3	1	1	3	6	8	14
28	male	10	10	9	14	10	10	9	9	21	10	17	11	43	28	2	2	2	3	1	2	3	3	3	1	2	2	3	1	2	2	2	1	12	14	11
29	male	7	15	13	11	10	11	13	11	10	7	15.0468	10.4006	49	35	3	1	1	2	1	1	3	3	3	1	2	2	2	1	1	3	1	1	9	14	9
30	male	8	11	8	9	11	11	10	8	15	16	13	10	39	29	2	3	1	3	1	1	3	2	3	1	2	2	2	1	2	3	1	1	11	13	10
31	male	5	9	10	12	9	11	11	8	15	12	13	9	40	30	3	3	1	2	1	2	3	3	3	1	1	3	3	1	1	2	1	1	12	14	9
32	female	12	8	7	9	11	8	8	10	17	7	11	7	35	26	2	3	1	3	1	2	2	2	1	1	1	2	2	2	2	1	1	2	12	9	10
33	female	11	7	12	4	9	7	12	9	20	9	14	9	32	28	2	1	1	3	1	2	2	2	1	1	2	2	3	2	1	2	1	2	10	10	11
34	female	3	10	9	9	9	9	11	10	20	11	14	10	37	30	3	3	1	2	1	1	3	3	2	1	2	3	3	1	1	2	1	1	11	14	9
35	female	3	8	11	11	12	13	12	12	20	14	16	12	42	37	3	3	2	3	1	1	3	3	2	1	2	3	3	1	1	2	1	1	13	14	9
36	female	8	11	12	14	10	6	12	12	15	15	14	10	47	30	3	2	1	2	2	1	3	3	3	2	3	3	2	2	1	3	1	1	11	17	10
37	female	17	5	11	4	11	3	14	14	22	12	16	12	31	31	2	1	2	2	1	1	1	1	1	1	2	1	1	1	1	2	1	2	9	7	8
38	female	19	8	8	3	7	6	11	3	16	8	10	8	26	20	2	2	1	2	1	2	2	1	1	1	2	1	1	2	2	1	2	2	10	8	10
39	female	18	6	9	7	11	7	12	10	22	11	19	11	33	29	2	2	2	2	2	2	2	2	2	1	2	1	2	2	1	1	2	2	12	10	10
40	female	24	12	10.8831	7	10	10	11	14	21	15	14	11	39.8831	35	2	2	2	1	2	2	2	2	2	3	2	2	1	2	3	1	2	3	11	13	12
41	female	9	9	8	4	12	5	12	10	23	6	9	10	33	27	2	2	1	2	1	2	2	3	1	1	2	2	2	2	1	2	1	1	10	11	9
42	female	15	11	10	4	11	3	9	10	21	7	8	9	36	22	3	2	2	3	2	2	3	2	1	3	2	3	2	2	3	1	2	1	14	14	11
43	female	17	10	5	9	9	11	12	13	21	11	19	11	33	36	2	2	1	3	2	2	2	2	1	2	2	1	2	2	2	1	2	2	12	10	11
44	female	9	11	10	8	9	9	10	10	17	8	11	8	38	29	2	3	2	3	1	2	2	2	2	1	2	2	3	1	1	2	1	1	13	11	9
45	female	18	10	7	7	8	5	10	9	15	7	10	8	32	24	2	2	2	2	2	2	2	2	2	1	2	2	1	3	1	2	2	2	12	11	11
46	male	9	10	9	10	11	9	11	8	16	12	15	9	40	28	2	2	1	3	1	2	2	2	2	1	2	2	3	1	1	2	1	1	11	11	9
47	male	4	13	10	14	13	13	13	12	18	15	14	7	50	38	3	2	1	3	1	1	3	3	3	1	2	3	3	1	1	2	1	1	11	15	9
48	male	10	8	9	11	8	11	8	10	17	14	13	8	36	29	2	3	1	3	1	2	2	2	3	1	2	2	3	1	1	2	1	2	12	12	10
49	male	5	12	14	13	13	15	12	13	16	9	13	8	52	40	3	2	1	3	2	2	3	3	3	1	3	3	3	1	1	3	1	1	13	16	10
50	male	17	3	5	3	4	3	11	3	16	4	17	4	15	17	2	1	3	3	3	1	2	3	1	1	1	2	3	3	3	1	1	3	13	10	14
51	male	6	9	13	9	8	10	10	11	16	8	13	9	39	31	2	2	1	2	1	2	3	3	2	1	2	2	3	1	1	3	1	1	10	13	10
52	male	10.3719	13	11	12	13	10.1494	12	9	12	16	20	11	49	31.1494	2	2	1	3	2	1	2	3	3	1.37194	2	3	2	1	2	2	1	2	11	14.3719	10
53	male	17	10	11	13	7	12	5	10	18	8	14	12	41	27	2	1	1	2	2	3	2	2	2	1	2	2	2	1	2	2	1	3	11	11	11
54	male	9	13	9	12	11	10	15	14	23	15	18	9	45	39	3	3	2	3	1	2	3	2	3	1	2	3	2	1	1	2	2	1	14	14	9
55	male	13	6	4	15	6	10	10	13	19	12	18	11	31	33	3	3	2	3	2	2	3	3	3	2	2	1	1	2	1	2	2	1	15	14	9
56	male	14	9	8	5	9	11	8	9	17	8	15	11	31	28	2	3	3	2	3	2	3	3	3	1	2	2	3	1	1	1	1	3	15	14	10
57	female	31	8	11	15	8	13	9	15	22	12	19	11	42	37	1	2	3	1	3	3	2	1	1	3	1	1	1	3	3	2	3	3	13	9	15
58	female	7	13	7	9	14	14	13	12	20	16	19	11	43	39	3	3	2	3	1	1	3	2	2	1	2	3	3	2	1	2	2	1	13	13	11
59	female	13	8	10	8	7	6	13	6	16	9	13	9	33	25	2	3	1	1	1	2	2	3	3	1	2	1	3	1	2	1	1	2	10	12	10
60	female	11	10	8	6	8	9	11	9	16	12	12	9	32	29	2	2	1	3	1	2	2	2	3	1	2	2	3	2	1	2	1	1	11	12	10
61	female	13	11	6	8	7	6	11	7	17	14	19	11	32	24	2	3	2	3	1	2	1	2	1	1	2	1	2	1	1	1	1	2	13	8	8
62	female	11	10	12	9	10	15	14	14	18	13	15	10	41	43	2	2	1	2	1	2	2	2	2	1	2	2	3	1	1	2	1	2	10	11	10
63	female	10	10.2342	10.4659	8.25519	9.92661	9.76082	10.6781	10.5896	0	0	0	0	38.8819	31.0286	3	2	2	3	2	2	3	3	2	2	3	2	3	1	1	2	2	2	14	15	11
64	female	11.4247	9	6	8	8	6	10	10	22	14	13	11	31	26	2	2	1	3	1	2	2	3	1	1	2	2	3	1	1.42469	1	3	3	11	11	12.4247
65	female	16	8	14	15	11	11	11	15	16	9	16	15	48	37	2	2	3	3	2	3	3	3	3	2	2	1	2	2	1	3	2	2	15	14	12
66	female	13	4	10	3	3	3	12	7	19	13.6179	20	14	20	22	2	3	2	1	2	2	2	3	2	2	1	2	3	1	2	3	2	2	12	12	13
67	female	15	7	7	7	6	6	9	12	17	10	13	11	27	27	2	2	2	2	1	2	2	2	2	1	1	2	2	1	1	1	2	2	11	10	9
68	female	17	6	9	9	6	3	6	8	23	10	11	11.2487	30	17	2	3	2	3	2	3	2	2	1	2	1	1	3	2	2	2	2	3	15	9	14
69	female	23	3	6	3	5	8	9	11	22	14	8	8	17	28	2	1	3	2	2	2	1	2	2	2	1	1	1	2	1	1	2	2	12	9	9
70	male	8.17015	15	10	3	9	15	10	7	19	8	10	5	37	32	3	2.32255	1.49269	3	1	2	3	3	3	1	2	2	3	1	2	2	1	2	12.8152	14	11
71	male	7	15	12	14	14	15	13	15	17	10	19	16	55	43	3	3	1	3	2	1	3	3	3	3	3	3	1	1	1	3	1	1	13	18	8
72	male	4	6	15	13	12	8	9	11.4174	13	12	12	8	46	28.4174	3	2	1	3	1	1	3	3	3	1	2	3	3	2	1	3	1	1	11	15	11
73	male	22	7	3	3	7	5	7	7	7	4	5	4	20	19	1	1	1	1	3	1	1	1	1	3	1	1	1	1	3	3	1	1	8	8	10
74	male	16	3	3	6	3	3	6	4	13	9	9	15	15	13	2	2	1	1	1	2	2	2	2	1	1	1	2	2	1	1	2	1	9	9	9
75	male	11.209	13	6	12	13	14	8	13	12	14	14	10	44	35	2.39476	2.32255	1.49269	2.49424	1.51207	1.80689	2.40084	2.49635	2.27983	1.37194	1.9341	2.11029	2.33998	1.50993	1.42469	2.13075	1.41213	1.58498	12.0232	12.5934	10.4025
76	male	4	15	14	13	15	13	9	6	10	16	8	10	57	28	3	2	1	3	1	2	3	3	3	1	2	3	3	1	1	3	1	1	12	15	10
77	male	11	9	6	7	6	9	9	11	18	10	13	8	28	29	2	2	2	1	1	2	2	3	2	1	2	2	3	2	1	2	1	1	10	12	10
78	male	7	11	9.4659	11	10	11	13	11	12	9	15	9	41.4659	35	3	3	1	3	1	2	3	2	3	1	2	2	2	1	1	3	1	1	13	13	9
79	male	6	14	14	13	15	15	15	12	24	16	20	16	56	42	3	2	1	3	1	2	3	3	3	2	1	3	2	1	1	3	1	1	12	15	9
80	male	4	14	10	15	12	13	15	14	7	11	20	12	51	42	3	3	1	3	1	1	3	2	3	1	3	3	3	1	1	3	1	1	12	15	10
81	male	2.66002	14	15	14	15	15	13.222	12	13	16	19	15	58	40.222	3	3	1	3	1	1	3	3	3	1	3	3	2.33998	1	1	3	1	1	12	16	9.33998
82	male	11	8	6	4	13	10	11	6	17	12	19	11	31	27	2	3	1	3	2	2	3	3	3	3	3	2	2	2	2	3	1	1	13	17	11
83	female	9	9	12	8	11	9	12	11	24	12	12	9	40	32	2	2	2	3	2	2	3	3	2	1	3	3	2	1	2	2	1	1	13	15	9
84	female	11.6518	11	13	12	8	15	11	14	23	11	19	13	44	40	2	3	2	3	2	3	2	2	2.27983	1.37194	2	2	3	1	1	2	1	1	15	11.6518	9
85	female	1	15	14	12	13	13	14	10.4174	14	13	18	5	54	37.4174	3	3	1	3	1	1	3	3	2	1	3	3	3	1	1	3	1	1	12	15	10
86	female	4	13	11	14	15	15	13	15	22	8	17	7	53	43	3	3	1	3	1	2	3	3	3	1	3	3	3	1	1	2	1	1	13	16	9
87	female	10	3	7	5	5	6	8	8	23	8	15	10	20	22	2	3	2	2	2	1	3	3	1	1	1	2	3	1	2	1	2	2	12	11	11
88	female	9	8	9	9	14	9	10	13	23	8	19	12	40	32	2	2	1	3	1	1	2	2	2	1	2	2	2	1	1	2	1	1	10	11	8
89	female	12	9	6	7	10	6	9	11	22	10	18	7	32	26	2	2	2	3	1	2	2	2	2	1	2	2	2	2	1	2	1	1	12	11	9
90	female	21	8	11	9	10	15	15	8	22	7	20	16	38	38	3	1	2	3	3	3	1	3	1	3	1	1	1	2	2	3	3	3	15	10	14
91	female	22	6	7	4	5	10	13	9	18.5258	11	11	9	22	32	2	2	2	2	2	2	1	1	1	3	1	1	1	1	2	1	2	1	12	8	8
92	female	7	14	11	12	14	14	11	12	19	12	17	9.8047	51	37	3	2	2	3	1	2	3	3	2	1	3	3	3	2	1	2	1	2	13	15	11
93	female	22	10	7	9	6	7	12	6	22	7	14	9	32	25	2	2	3	2	2	2	2	2	1	3	1	1	2	2	2	1	2	3	13	10	12
94	female	27	3	3	3	3	3	5	5	21	10	11	5	12	13	1	1	1	1	1	3	1	1	2	3	1	1	1	2	2	1	1	3	8	9	10
95	female	8	13	10	14	14	13	13	11	23	12	15	16	51	37	2	2	1	3	2	1	3	2	2	1	2	2	3	1	1	2	1	1	11	12	9
96	male	7.27983	8	13	9	13	6	10	6	14	8.87144	10	9.55603	43	22	2	3	1	3	1	1	2	2	2.27983	1	2	2	3	2	1	3	1	1	11	11.2798	11
97	male	8	8	12	6	10	9	12	9	16	10	17	9	36	30	3	3	3	3	3	2	3	3	1	1	2	2	3	2	2	3	1	1	17	12	12
98	male	6	7	11	9	10	7	12	7	19	10	11	7	37	26	3	2	1	2	1	2	3	3	3	1	2	2	3	1	1	3	1	1	11	14	10
99	male	17	5	3	6	5	3	5	4	18.78	11	15	7	19	12	1	2	2	3	2	1	1	2	1	2	1	1	2	1	1	1	2	2	11	8	9
100	male	12	10	8	9	10	9	12	7	10	9	9	5	37	28	2	2	1	3	1	2	2	1	2	1	2	2	3	1	1	2	1	2	11	10	10
101	male	3	13	13	13	12	10	11	10	16	16	16	12	51	31	3	3	1	3	1	2	3	3	2	1	2	3	2	1	1	3	1	1	13	14	9
102	male	13	7	9	3	5	13	15	6	19	15	11	10	24	34	2	2	1	3	1	2	3	2	2	2	2	2	2	3	2	3	1	2	11	13	13
103	male	12	9	9	9	9	9	13	9	19	9	14	9	36	31	2	2	1	2	1	2	2	2	3	1	1	1	3	1	1	2	1	1	10	10	9
104	male	12	8	8	6.24372	5	6	14	9	16.2694	11	16	10	27.2437	29	2	3	1	3	1	1	3	1	3	2	2	2	1	1	1	3	1	2	11	13	9
105	male	8	13	9	15	13	12	11	12	13	11	14	7	50	35	3	3	3	3	3	1	3	3	3	1	3	3	2	1	1	2	1	1	16	16	8
106	male	4.37194	10	9	12	9	6	10	8	15	13	16	11.8047	40	24	3	3	1	3	1	1	3	3	2	1.37194	2	2	2	1	1	2	1	1	12	13.3719	8
107	male	6	12	11	12	11	10.1494	9	12	8	5	8	4	46	31.1494	3	2	1	3	1	1	3	2	3	1	3	3	3	2	1	3	1	1	11	15	11
108	male	14	9	8	5	4	3	4	7	10	8	8	15	26	14	3	2	1	1	2	1	2	2	3	2	1	2	2	1	1	2	1	2	10	12	9
109	female	9	12	11	12	10	9	11	12	15	7	15	8	45	32	3	2	1	3	1	2	3	2	3	1	2	2	3	2	1	2	1	1	12	13	10
110	female	8	10	11	14	10	8	14	10	11	12	16	7	45	32	2	3	1	3	1	2	3	2	3	1	2	2	3	2	1	3	1	1	12	13	11
111	female	12	12	8	9	11	14	13	10	24	13	19	13	40	37	2	2	2	3	1	2	3	2	3	1	2	2	2	1	2	3	1	2	12	13	11
112	female	6	12	11	13	11	8	12	9	20	14	17	14	47	29	3	2	1	3	2	1	3	3	2	1	2	2	3	2	1	2	1	1	12	13	10
113	female	27	6	3	3	3	3	11	13	7	4	9	4	15	27	1	1	3	1	3	3	1	3	1	2	1	1	2	3	2	1	3	3	12	9	14
114	female	17	6	9	12	13	8	13	10	24	7	16	8	40	31	2	2	3	1	2	1	2	2	3	1	2	1	3	1	1	1	2	1	11	11	9
115	female	15	3	6	3	8	8	12	8	27	15	20	11	20	28	3	2	3	3	2	1	2	2	3	1	1	2	3	3	2	2	2	1	14	11	13
116	female	5	12	8	12	9	9	8	10	21	11	17	11	41	27	3	3	1	3	1	2	3	2	3	1	2	3	3	1	1	3	1	1	13	14	10
117	female	9	9	11	7	11	11	14	11	17	12	12	8	38	36	3	2	1	2	2	2	2	3	3	2	3	3	3	2	1	3	1	1	12	16	11
118	female	13.2798	8	7	9	11	7	9	8	18	11.3043	15.9006	8.55603	35	24	2	2	2	2	1	2	2	2	2.27983	1	2	2	2	2	1	2	1	1	11	11.2798	9
119	female	NaN	10.2342	7.98209	9.35217	9.92661	9.76082	10.6781	10.5896	18.1418	10.9222	15.0468	10.4006	37.4951	31.0286	NaN	3	1.49269	2.49424	1.51207	3	2.40084	3	3	1.37194	1.9341	2.11029	2.33998	3	1.42469	2.13075	1.41213	1.58498	11.499	13.8172	11.8925
120	female	12	10	8	9	11	11	10	9	11	9	11	6	38	30	3	2	1	2	1	2	2	2	2	1	2	1	3	2	1	2	1	2	11	10	11
121	female	12	7	7	14	11	11	12	12	19	5	13	8	39	35	2	2	1	3	1	2	2	2	2	1	2	1	3	2	2	2	1	1	11	10	11
122	male	6	11	10	13	12	15	13	10	18	9	14	9	46	38	2	3	1	3	1	2	3	3	3	1	2	2	3	1	1	2	1	1	12	14	9
123	male	3	15	14	15	15	14	15	13	13	13	20	13	59	42	3	3	1	3	1	2	3	3	3	1	2	3	3	1	1	3	1	1	13	15	10
124	male	4	12	12	9	13	12	11	14	12	8	13	9	46	37	3	3	1	2	1	2	3	3	3	1	2	3	3	1	1	3	1	1	12	15	10
125	male	8	10	11	11	14	10	11	12	19.2694	13	15	11.556	46	33	2	2	1	3	1	1	2	3	3	1	2	2	2	1	1	2	1	1	10	13	8
126	male	14	10	14	15	10	12	11	12	19	11	15	10	49	35	3	2	1	2	1	3	3	1	3	2	2	2	2	1	1	2	1	1	12	13	8
127	male	4	15	10	10	10	9	12	9	13	15	13	10	45	30	2	3	1	2	1	1	3	3	3	1	2	3	3	1	1	3	1	1	10	15	10
128	male	8	10	11	6	9	10	12	10	19	10	13	7	36	32	2	2	1	2	1	1	3	3	3	1	2	2	3	1	1	1	1	1	9	14	8
129	male	2	12	11	9	11	12	11	10	21	12	15	9	43	33	3	3	1	3	1	1	3	3	3	1	3	3	3	1	1	3	1	1	12	16	10
130	male	10	3	14	13	9	15	12	14	19	16	20	16	39	41	2	1	1	3	1	2	2	3	3	1	1	3	1	1	1	3	1	2	10	13	9
131	male	12	9	9	9	9	9	9	9	21	10	16	13	36	27	3	3	2	3	2	2	3	3	3	2	2	2	2	2	2	3	2	2	15	15	13
132	male	17	13	7	8	7	9	12	9	18	13	16	9	35	30	2	2	2	3	2	2	2	2	3	2	2	2	2	1	2	2	2	2	13	13	11
133	male	3	14	14	14	11	15	12	15	21	15	19	12	53	42	3	3	1	3	1	1	3	3	3	1	2	3	2	1	1	3	1	1	12	15	9
134	male	15	8	8	13	7	14	12	14	20	12	20	15	36	40	1	2	2	3	2	2	2	3	3	1	2	1	3	1	1	2	2	3	12	12	12
135	male	7	12	11	14	9	13	11	14	8	13	20	13	46	38	3	3	2	3	3	3	3	3	3	1	3	3	3	1	1	3	1	1	17	16	10
136	male	11	12	10	15	10	11	13	11	19.2694	12	18	13	47	35	2	2	1	3	1	2	2	2	2	2	2	3	2	2	1	2	1	1	11	13	9
137	female	9	12	10	9	10	15	11	12	20	13	19	9	41	38	3	3	1	2	1	2	2	2	3	1	3	2	3	1	1	2	1	1	12	13	9
138	female	8	13	9	5	12	12	11	15	21	9	19	8	39	38	3	2	2	3	2	3	2	3	1	1	2	3	3	1	1	2	1	2	15	12	10
139	female	7	15	11	14	9	8	14	12	17.7308	12	18	13	49	34	3	2	2	3	1	1	3	3	3	2	2	2	3	1	1	2	1	1	12	15	9
140	female	30	4	5	3	3	3	12	13	25	4	6	10	15	28	1	1	2	1	3	1	1	1	2	3	1	1	1	2	3	1	2	3	9	9	12
141	female	4	7	12	13	14	12	11	10	21	14	15	7	46	33	3	3	1	3	1	1	3	3	3	1	2	2	3	1	1	2	1	1	12	14	9
142	female	11	8	7	4	9	6	6	10	25	11	16	10	28	22	2	3	2	2	1	2	2	3	1	1	2	1	3	2	2	1	1	1	12	10	10
143	female	21	8.47016	9	3	9	3	9.87891	9	22	16	14	7	29.4702	21.8789	2	1	2	2	3	1	1	2	1	2	1	1	1	3	2	2	1	2	11	8	11
144	female	6	13.3347	7	6	15	9	5	11	16	7	13	8	41.3347	25	3	3	2	2	1	1	3	3	3	1	2	2	3	1	1	2	1	1	12	14	9
145	female	11	8	7	11	8	10	9	9	16	9	11	10	34	28	3	2	1	3	2	2	3	2	3	1	2	2	3	2	2	2	1	1	13	13	11
146	female	18	11	10	12	12	11	8	10	19	12	19	12	45	29	2	2	2	2	2	2	2	2	2	2	2	2	2	2	2	2	2	2	12	12	12
147	female	18	3	6	3	3	6	14	10	18	15	10	4	15	30	1	2	1	1	1	1	1	1	2	1	1	1	2	2	1	1	1	1	7	7	8
148	male	5	15	12	14	14	15	10	15	20.7785	11	19	10	55	40	3	3	2	3	2	1	3	3	3	1	3	3	3	1	1	2	1	1	14	16	9
149	male	9	10	8	12	10	9	11	9	15	9	11	8	40	29	3	2	1	3	1	2	3	2	2	1	2	2	1	1	1	3	1	2	12	12	9
150	male	12	10	10	15	14	12	12	15	16	15	17	10	49	39	2	2	2	1	1	2	2	3	3	1	2	2	2	1	1	2	1	1	10	13	8
151	male	17	10	8	10	8	9	10	6	14	14	20	15	36	25	2	1	2	3	3	2	3	3	2	2	2	2	2	2	2	2	2	3	13	14	13
152	male	6	9	11	10	9	12	10	10	21	10	17	12	39	32	3	3	1	2	1	2	3	3	3	1	2	3	3	1	1	2	1	2	12	15	10
153	male	12.5121	8	9	10	12	12	9	12	18.1418	10.9222	15.0468	10.4006	39	33	3	3	3	1	1.51207	2	3	3	2	1	2	2	2	2	2	1	1	1	13.5121	13	9
154	male	8	11	10	14	11	15	11	15	19	12	17	14	46	41	3	3	1	3	1	2	3	3	3	1	2	3	3	1	1	1	3	2	13	15	11
155	male	8	12	13	12	14	14	14	10	20	13	15	12	51	38	3	3	2	3	2	1	3	3	3	1	3	3	3	2	2	3	2	2	14	16	14
156	male	15	7	6	7	10	9	8	11	18	12	15	11	30	28	2	1	1	3	1	2	2	2	2	1	2	1	2	2	1	2	1	3	10	10	11
157	male	8	8	9	8	7	6	9	12	18	9	13	11	32	27	2	3	1	3	1	3	3	3	2	1	2	2	2	1	1	2	1	2	13	13	9
158	male	6	15	11	15	15	15	11	15	12	12	13	11	56	41	3	2	1	2	1	1	3	3	3	1	3	3	3	3	1	3	1	1	10	16	12
159	male	2	12	9	12	14	10	10	12	7	9	18	11	47	32	3	3	1	3	1	1	3	3	3	1	3	3	3	1	1	3	1	1	12	16	10
160	male	13.9772	7	9	6	8	9	12	12	18	10	12	10	30	33	2.39476	3	1	2	2	2	1	2	2	1.37194	2	2	1	1	1	2	1	2	12.3948	10.3719	8
161	male	14	8	6	12	6	7	15	11	19	15	20	16	32	33	2	2	2	3	2	2	3	3	3	2	2	3	2	1	2	1	2	2	13	16	10
162	female	21	14	11	4	13	12	13	12	14	16	20	13	42	37	1	2	2	3	2	2	1	2	3	2	2	1	3	2	2	1	2	2	12	11	12
163	female	4	15	13	10	11	15	11	12	11	7	15	6	49	38	3	2	2	3	1	1	3	3	2	1	3	3	3	2	1	3	1	1	12	15	11
164	female	25	7	7	9	8	9	11	11	22	10	6	5	31	31	1	2	2	1	2	2	1	1	2	2	1	1	2	2	2	1	2	2	10	8	11
165	female	15	9	6	9	9	11.4414	10	9	18	12	15	12	33	30.4414	2	2	2	3	2	2	2	2	1	2	2	2	2	2	1	2	2	2	13	11	11
166	female	11.1642	7	8	9	9	9	9	9	18.2694	8.83456	14.6514	10.58	33	27	1	3	1	2	1.51207	2	2.40084	3	1	1.37194	1	2.11029	3	1.50993	2	2.13075	1.41213	3	10.5121	10.8831	13.0528
167	female	13	11	10	11	7	5	10	12	15	4	6	8	39	27	2	3	1	2	1	2	2	2	1	2	1	2	2	2	1	1	1	2	11	10	9
168	female	13	10	10	9	11	12	11	11	19	10	12	9	40	34	2	3	1	2	1	2	2	2	3	2	2	1	2	1	1	3	1	2	11	12	10
169	female	19	10	7	9	10	8	10	10	24	8	14	12	36	28	3	2	2	2	2	2	2	2	2	2	2	2	2	3	3	2	2	2	13	12	14
170	female	28	11	10	6	8	9	9	11	16	10	13	10	35	29	1	1	3	1	2	2	1	1	2	3	2	1	1	1	2	2	2	3	10	10	11
171	female	15	11	12	11.2437	9	10	10	12	21	10	14	12	43.2437	32	2	2	2	2	2	2	2	3	2	2	3	2	2	1	1	1	2	2	12	14	9
172	female	8	14	11	14	12	13	10	11	22	15	20	15	51	34	3	2	2	3	1	2	3	3	2	1	2	3	3	2	3	3	1	2	13	14	14
173	female	24	7	6	9	10	9	9	7	24	13	15	10	32	25	1	2	2	2	3	2	2	1	1	2	2	1	2	2	2	1	3	2	12	9	12
174	male	16	9	8.4659	9	9	9	9	9	8	4	7	4	35.4659	27	2	2	1	2	1	2	2	2	2	2	2	2	2	2	2	2	2	2	10	12	12
175	male	4	14	12	13	12	15	12	10	14	10	16	10	51	37	3	2	1	3	1	1	3	3	3	1	2	3	2	1	1	3	1	1	11	15	9
176	male	4	7	13	13	13	12	15	11	23	11	17.9006	9	46	38	3	3	1	3	1	2	3	3	3	1	2	3	3	1	1	2	1	1	13	15	9
177	male	9	12	12	15	14	12	11	13	20	11	10	10	53	36	2	3	1	3	1	3	2	3	3	1	2	2	2	1	1	2	1	1	13	13	8
178	male	3	12	12	15	14	13	13	13	16	12	18	13	53	39	2	3	1	3	1	1	3	3	3	1	2	3	3	1	1	3	1	1	11	15	10
179	male	16	11	10	5	11	11	11	15	23	9	5	4	37	37	3	2	3	3	2	2	2	2	2	2	1	2	3	2	2	2	2	2	15	11	13
180	male	13	11	12	9	12	9	10	12	19	12	16	12	44	31	2	2	1	2	1	2	2	3	3	1	2	2	2	2	1	2	2	2	10	13	11
181	male	5	12	5	9	9	9	10	9	18	10	15	8	35	28	3	3	1	2	1	1	3	3	3	1	2	3	2	1	1	2	1	1	11	15	8
182	male	18	5	7	5	11	8	8	8	15	8	12	10	28	24	2	3	3	1	1	2	1	2	3	1	2	2	2	2	1	1	1	2	12	11	9
183	male	14	10	8	7	10	9	14	7	18.1418	10.9222	15.0468	10.4006	35	30	3	2	1	3	1	3	2	1	3	1	2	2	1	1	1	3	1	2	13	11	9
184	male	9	11	12	12	12	9	10	13	16	9	15	12	47	32	3	3	1	3	2	2	3	2	3	1	2	2	2	1	1	3	1	2	14	13	10
185	male	4	13	13	8	12	4	15	11	17	11	17	9	46	30	3	3	1	2	1	1	3	3	3	1	2	3	2	1	1	3	1	1	11	15	9
186	male	15	9	7	9	8	9	9	9	16	11	14	9	33	27	2	1	1	3	2	2	2	2	2	2	2	2	2	1	1	2	2	2	11	12	10
187	male	9	10	12	11	9	11	12	8	8	9	9	4	42	31	3	3	1	2	1	1	2	2	3	1	2	2	2	1	1	2	1	1	11	12	8
188	male	27	3	3	3	3	3	7	3	7	4	5	4	12	13	2	1	3	3	3	3	1	2	2	3	1	2	1	3	3	1	3	1	15	11	12
189	male	17	6	5	3	4	6	11	7	14	6	11	14	18	24	2	2	2	2	2	2	2	2	2	2	2	2	2	2	1	2	2	2	12	12	11
190	female	11.1695	5	7	5	6	10	8.57724	13.8619	23.3309	10.0877	13	9	23	32.4392	2	2	1	2	1	1	2	2	2.27983	1	1.9341	2.11029	2	2	1	2	1	1	9	11.3242	9
191	female	13	14	9	11	9	6	9	8	20	10	15	14	43	23	3	3	2	2	2	2	2	3	3	2	2	2	2	1	2	3	2	2	14	14	12
192	female	15	9	8	8	6	12	8	12	19	10	15	12	31	32	3	2	2	3	2	2	2	2	3	1	2	2	2	2	2	3	2	2	14	12	13
193	female	16	11	15	12	13	12	8	14	17	13	19	11	51	34	2	2	2	1	1	2	2	2	2	1	2	1	2	1	2	3	2	2	10	10	12
194	female	18	6	11	6	6	7	9	11	23	10	14	10	29	27	2	1	2	2	1	2	2	2	2	2	1	1	2	2	1	2	2	2	10	10	11
195	female	8	11	11	4	12	12	7	15	20	14	18	9	38	34	2	2	1	3	1	2	3	3	3	1	3	2	3	2	1	3	1	2	11	15	12
196	female	18	9	8	6	9	10	11	11	20	8	13	8	32	32	2	2	2	2	2	2	2	2	3	1	2	2	2	2	2	2	2	2	12	12	12
197	female	11	12	11	10	12	9	6	10	20	13	13	10	45	25	3	2	2	3	3	2	3	3	1	1	2	2	2	2	2	2	2	1	15	12	11
198	female	15	10	8	7	9	10	11	11	21	13	14	11	34	32	2	3	2	3	1	2	2	2	2	1	2	2	2	2	2	1	2	2	13	11	11
199	female	22	6	10	10	9	9	9	9	21	8	12	8	35	27	1	3	3	3	3	1	1	2	2	2	2	1	1	2	2	2	3	2	14	10	12
200	female	10	12	14	12	12	13	13	15	20	14	18	12	50	41	3	2	2	3	1	2	3	2	3	1	2	2	3	2	1	3	1	2	13	13	12
201	female	3	11	10	15	13	9	13	15	19	16	14	10	49	37	3	3	1	3	1	1	3	3	3	1	3	3	3	1	1	2	1	1	12	16	9
202	male	3	11	15	10	11	8	9	10	19	11	11	12	47	27	3	3	2	3	1	1	2	3	1	1	2	2	3	1	1	3	1	1	13	11	10
203	male	15	11	9	8	7	7	6	8	23	11	15	13	35	21	2	3	2	3	2	2	2	2	2	2	2	2	3	1	2	1	2	2	14	12	11
204	male	19	10	11	7	8	6	15	13	21	11	15	7	36	34	2	1	2	3	2	1	1	2	1	2	1	1	2	2	2	2	2	3	11	8	13
205	male	15	8	5	7	6	7	10	12	18	8	16	12	26	29	2	2	2	2	1	2	3	3	2	1	2	1	2	2	2	1	2	2	11	12	11
206	male	20	7	7	7	5	7	13	7	20	11	15	9	26	27	2	2	2	2	2	2	2	2	3	2	2	1	2	1	2	2	2	3	12	12	12
207	male	12	12	15	10	15	12	9	11	19	12	16	10	52	32	2	1	1	3	1	3	2	3	1	1	2	1	2	1	2	2	1	2	11	10	10
208	male	5	11	11	7	13	12	14	14	14.5258	16	19	13	42	40	3	3	1	3	1	2	3	2	2	1	2	3	3	1	1	2	1	1	13	13	9
209	male	11	6	13	11	10	14	10	12	18	9	11	9	40	36	2	2	1	2	1	2	3	3	3	1	2	2	3	1	2	1	1	2	10	14	10
210	male	13	10	11	8	8	8	12	9	20	11	16	11	37	29	2	3	3	2	1	1	2	2	3	1	2	1	2	1	1	2	1	1	12	11	8
211	male	14	10	11	15	14	15	10	11	21	11	16	12	50	36	2	2	1	3	2	2	2	2	2	2	2	2	1	1	1	2	1	2	12	12	8
212	male	12	9	10	11	10	12	9	9	19	10	18	11	40	30	2	2	2	3	1	1	2	2	2	1	2	2	2	1	1	2	2	2	11	11	10
213	male	11	13	9.4659	8	13	10	15	11	20	14	17	12	43.4659	36	2	3	2	2	2	1	3	2	3	1	2	2	3	2	1	2	1	1	12	13	10
214	male	8	9	11	10	9	9	12	6	7	4	9	9	39	27	3	1	1	3	1	3	3	2	1	1	2	3	1	1	1	3	1	1	12	12	8
215	male	11	9	7	6	6	6	11	9	22	8	14	10	28	26	2	2	1	2	1	2	3	3	3	1	2	2	2	1	1	2	2	2	10	14	10
216	male	13	7	9	9	10	6	11	10	22	10	14	10	35	27	2	2	1	2	1	3	2	3	3	1	2	2	3	2	1	2	2	2	11	13	12
217	female	8	9	10	7	6	12	12	12	18	10	13	9	32	36	2	2	2	3	1	3	2	3	1	1	2	3	3	2	1	2	1	1	13	12	10
218	female	12.7239	9	10	10	9.05741	9	9	9	7	4	5	4	38.0574	27	2	2	1	2	1	2	2	2	2.27983	1.37194	2	2	2.33998	1	1	2	1.41213	2	10	11.6518	9.75211
219	female	15	12	11	12	12	8	11	11	19	9	16	12	47	30	2	2	2	3	2	2	2	3	1	2	2	2	2	2	2	1	2	2	13	12	11
220	female	21.9573	3	4	3	3	7	10	9	22.2694	7	14	12	13	26	2	2.32255	2	1	3	2	2	1	2.27983	2	1	1	2	2	1	2	2	2	12.3225	9.27983	11
221	female	9	9	10	7	8	9	9	13	21	14	14	8	34	31	3	3	1	2	1	2	2	2	2	1	2	2	2	1	1	2	1	1	12	11	8
222	female	20	6	5	4	5	7	7	6	22	5	13.9006	7	20	20	2	1	2	1	2	2	2	3	2	2	1	1	2	1	3	1	2	2	10	11	11
223	female	9	12	12	12	14	12	10	12	21	12	18	12	50	34	3	2	1	2	1	2	2	3	2	1	2	2	3	2	1	2	1	2	11	12	11
224	female	17.2798	9	12	6	11	9	8	11	16	11.8346	15.7835	10.58	38	28	2	3	1	2	2	1	2	2	2.27983	2	2	1	2	3	2	2	2	2	11	11.2798	13
225	female	13.8069	11	8	11	12	7	10	12	15	12	17	13	42	29	2	2	2	3	1	1.80689	2	2	3	1	2	2	2	1	1	2	2	2	11.8069	12	10
226	female	13	13	8	5	14	9	12	8	20	16	18	12	40	29	2	2	2	2	2	2	2	3	2	2	2	1	2	1	1	2	1	1	12	12	8
227	female	14	7	8	10	9	7	11	14	19	10	18	13	34	32	2	2	1	1	1	2	2	1	2	1	1	2	3	2	1	2	1	1	9	9	10
228	female	9	6	8	6	6	7	15	8	21	9	10	10	26	30	2	3	1	2	1	2	2	2	1	1	2	1	3	1	1	2	1	1	11	9	9
229	male	10	12	15	15	13	13	15	15	13	15	19	10	55	43	2	3	1	2	2	1	2	3	3	1	2	2	2	1	1	2	2	1	11	13	9
230	male	8	9	10	9	9	9	11	9	7	4	14	7	37	29	2	3	1	3	1	1	2	2	3	1	2	2	2	1	1	3	1	1	11	12	9
231	male	3	12	11	6	9	8	10	10	20	9	11	8	38	28	3	3	1	2	1	1	3	3	2	1	2	2	3	1	1	3	1	1	11	13	10
232	male	8	8	7	8	8	4	14	13	18	5	15	10	31	31	3	3	1	1	1	2	3	3	3	1	1	2	2	1	1	2	1	1	11	13	8
233	male	7	13	13	13	14	14	10	15	18	12	18	13	53	39	3	3	2	3	1	1	3	3	3	1	2	3	3	1	1	1	2	2	13	15	10
234	male	14	6	10	7	9	8	10	10	23	12	15	12	32	28	2	3	2	2	2	2	2	3	3	1	1	2	2	2	2	2	2	1	13	12	11
235	male	21	6	6	10	9	9	10	9	23.3309	7	13	11	31	28	1	2	2	2	2	3	2	2	3	1	2	2	1	2	2	2	2	2	12	12	11
236	male	3	10	10	5	11	6	10	11	23	12	17	15	36	27	3	2	1	3	1	1	3	3	2	1	1	3	2	1	1	3	1	1	11	13	9
237	male	11	10	10	10	11	11	10	11	17	9	15	11	41	32	2	2	1	3	1	2	2	3	3	1	2	2	2	2	1	2	1	2	11	13	10
238	male	10	12	8	11	8	11	9	9	22	16	19	16	39	29	3	2	1	3	2	3	3	3	2	1	2	3	2	2	2	3	1	3	14	14	13
239	male	22	11	8	9	8	8	9	7	17	11	14	10	36	24	2	2	1	1	2	2	1	1	2	2	2	1	1	1	2	1	1	2	10	9	8
240	male	5	11	13	10	13	7	12	11	14	6	9	6	47	30	3	3	1	3	1	2	3	3	2	1	2	3	2	2	1	2	1	1	13	14	9
241	male	12	9	8	9	9	8	7	4	10	11	14	8	35	19	3	3	1	2	3	2	3	3	1	3	2	2	2	1	3	1	1	1	14	14	9
242	male	5	14	11	14	12	15	14	12	20	10	16	13	51	41	3	3	1	2	1	1	3	3	3	1	2	3	2	1	2	3	1	1	11	15	10
243	male	14	12	11	6	11	12	12	12	21	11	14	11	40	36	3	2	2	2	2	1	3	2	3	1	2	2	2	1	2	1	2	1	12	13	9
244	female	10	8	7	7	9	8	11	11	21	10	15	7	31	30	3	3	2	2	2	2	3	3	1	2	3	3	3	2	1	1	2	2	14	15	11
245	female	9	12	11	15	13	14	11	14	13	13	16	9	51	39	3	3	2	2	2	2	3	3	3	1	3	2	2	1	1	3	2	1	14	15	10
246	female	5	15	12	10	13	13	9	12	22	15	19	9	50	34	3	3	2	3	1	2	3	3	3	1	3	3	3	2	1	3	1	1	14	16	11
247	female	3	15	14	15	13	12	14	13	25	9	17	9	57	39	3	3	1	3	1	2	3	3	2	1	2	3	3	1	1	2	1	1	13	14	9
248	female	21	7	11	6	10	12	15	11	22	16	14	10	34	38	3	3	2	1	3	2	2	1	2	1	2	1	1	1	1	1	2	3	14	9	9
249	female	24	11	10	10	9	9	11	15	25	10	12	9	40	35	2	2	3	2	2	2	1	1	1	2	2	1	1	2	2	1	2	2	13	8	10
250	female	20	8	9	3	10	5	15	5	22	7	16	13	30	25	2	3	2	1	2	2	2	2	1	3	2	2	1	1	2	2	3	3	12	12	12
251	female	10	11	8	3	5	7	10	8	19	8	7	9	27	25	2	2	2	2	2	2	2	3	1	1	1	2	3	1	2	3	2	1	12	10	12
252	female	16	4	11	9	9	14	9	11	16	16	15	15	33	34	2	2	2	3	2	3	2	2	2	2	2	2	2	2	1	3	2	2	14	12	12
253	female	17	9	3	3	9	9	9	9	28	14	19	16	24	27	2	2	2	2	2	2	2	2	1	2	2	2	2	2	2	2	2	2	12	11	12
254	female	16	11	7	9	9	14	12	7	23	15	20	15	36	33	2	2	2	2	2	2	2	3	2	2	2	2	2	2	2	1	2	1	12	13	10
255	female	6	12	7	10	7	3	11	7	18	9	18	13.2487	36	21	3	3	2	3	1	2	3	3	2	1	2	3	3	2	1	1	1	1	14	14	9
256	female	26	12	12	12	12	12	10	12	18	12	15	12	48	34	3	2	3	2	3	2	1	1	1	3	2	1	2	3	3	1	2	2	15	9	13
257	male	2	15	15	15	15	15	15	15	14	16	20	16	60	45	3	3	1	3	1	1	3	3	3	1	3	3	3	1	1	3	1	1	12	16	10
258	male	9	15	15	7	13	12	12	13	16	7	9	7	50	37	2	3	1	3	1	2	2	3	3	1	2	2	1	1	1	2	1	1	12	13	7
259	male	12	7	10	11	9	12	9	13	14	11	19	14	37	34	2	2	1	3	1	2	2	3	3	1	2	2	2	2	1	2	2	2	11	13	11
260	male	7	9	11	10	14	10	11	9	20	10	19	11	44	30	2	2	1	3	1	1	3	3	3	1	2	2	3	2	1	2	1	1	10	14	10
261	male	12	10	15	15	15	15	15	15	23	16	19	14	55	45	3	1	2	3	2	3	3	3	3	1	2	2	2	2	1	2	1	1	14	14	9
262	male	5	12	12	15	13	12	14	11	21	16	20	9	52	37	3	3	2	3	1	2	3	3	3	1	2	3	2	1	1	3	1	1	14	15	9
263	male	18	4	8	3	8	11	4	7	20	6	9	7	23	22	2	3	1	1	2	3	2	2	2	2	2	1	2	2	2	1	1	1	12	11	9
264	male	12	11	8	10	10	6	7	13	16	15	14	11	39	26	3	3	2	2	1	1	2	2	3	2	2	2	2	1	1	2	1	2	12	13	9
265	male	16	7	12	13	8	7	4	6	20	9	6	5	40	17	2	2	2	3	2	1	3	3	3	2	1	1	1	2	2	2	2	2	12	13	11
266	female	9	12	12	10	12	11	11	10	14	12	16	13	46	32	3	2	2	3	2	2	3	3	2	1	2	3	3	2	2	3	2	2	14	14	14
267	female	17	12	11	6	11	14	13	14	22	15	17	9	40	41	2	2	2	1	2	1	1	3	3	2	2	1	3	2	2	2	2	1	10	12	12
268	female	8	12	13	9	14	13	11	15	22	15	18	16	48	39	3	3	2	3	1	2	3	3	3	1	3	3	3	1	3	3	2	2	14	16	14
269	female	13	12	13	14	14	9	11	12	21	11	20	9	53	32	2	1	2	2	2	1	2	3	2	1	2	1	2	1	1	2	2	1	10	11	9
270	female	14	10	12	9	6	11	10	11	21	10	11	9	37	32	2	2	2	2	2	2	2	3	2	1	2	2	2	1	2	3	2	3	12	12	13
271	female	8	12	12	10	10	11	12	14	18	13	19	12	44	37	2	3	2	3	1	1	2	3	2	1	2	2	2	2	1	2	1	1	12	12	9
272	female	9	12	10	7	9	10	9	11	20	10	18	11	38	30	2	1	1	3	1	2	2	3	2	1	2	2	2	1	1	2	1	1	10	12	8
273	female	6	12	7	13	12	5	8	12	22	16	20	15	44	25	3	3	1	3	1	2	3	3	1	1	3	3	3	2	2	2	2	2	13	14	13
274	female	11	11	7	7	9	12	13	11	20	11	16	11	34	36	3	2	1	1	1	2	2	3	3	1	2	1	2	1	1	3	1	2	10	12	10
275	female	8	6	10	12	6	6	14	13	26	9	16	9	34	33	3	2	1	3	1	3	3	3	2	1	1	2	1	1	2	3	1	1	13	12	9
276	female	11	9	10	10	8	11	10	11	19	12	20	12	37	32	2	2	2	3	1	2	2	2	1	1	1	2	2	2	1	2	1	1	12	9	9
277	female	7	12	10	8	11	11	14	13	19	12	14	9	41	38	2	3	1	3	1	2	2	3	3	1	2	2	3	1	1	2	1	1	12	13	9
278	male	9	11	8	10	8	9	10	10	21	8	11	8	37	29	3	2	2	3	2	2	3	3	3	2	2	3	3	1	2	3	2	1	14	16	12
279	male	18	11	9	3	13	10	10	10	22	13	20	14	36	30	2	2	2	3	2	3	2	2	2	1	1	2	2	2	1	1	2	3	14	10	11
280	male	12	12	10.5162	9	10	12	14	14	19	11	11	7	41.5162	40	2	3	2	3	2	1	2	3	3	1	2	2	2	1	1	1	2	2	13	13	9
281	male	19	9	7	3	8	11	10	10	18	7	16	11	27	31	2	2	1	1	2	2	1	2	2	2	2	2	2	1	3	2	2	2	10	11	12
282	male	9	10	10	10	9	7	10	9	16	8	13	11	39	26	2	3	1	3	1	1	2	2	3	1	1	2	2	1	1	2	1	1	11	11	8
283	male	10	9	9	9	9	9	9	9	18	10	12	8	36	27	2	2	1	2	1	1	2	2	2	1	2	2	3	2	1	2	1	1	9	11	10
284	male	9	11	12	11	13	12	7	9	17	13	13	13	47	28	3	3	1	2	1	2	2	3	3	1	2	2	2	1	1	2	1	2	12	13	9
285	male	4	14	13	14	14	13	12	12	17	16	18	16	55	37	3	3	1	3	1	2	3	3	3	1	3	3	2	1	1	3	1	1	13	16	9
286	male	10	12	10	9	8	7	11	13	21	11	9	12	39	31	3	2	2	2	2	1	3	3	2	2	1	1	3	2	2	3	1	1	12	12	12
287	male	13	9	9	9	7	7.44142	9	6	16	8	12	10	34	22.4414	2	2	1	3	1	2	2	2	2	1	1	2	2	1	2	2	1	3	11	10	11
288	male	3	15	14	14	15	13	14	15	15	11	19	4	58	42	3	3	1	3	1	1	3	3	3	1	2	2	3	1	1	3	1	1	12	14	10
289	male	7	12	12	10	11	12	13	10	9	12	15	11	45	35	3	3	3	3	1	2	3	3	3	1	2	2	2	1	1	3	1	1	15	14	9
290	male	13	13	6	11	6	8	10	9	17	12	16	13	36	27	2	2	1	3	1	3	2	2	2	1	2	1	2	1	1	2	1	2	12	10	9
291	female	15	6	7	9	6	7	8	14	23	10	19	7	28	29	1	2	3	3	2	2	1	3	2	1	1	1	3	2	1	2	1	2	13	9	11
292	female	8	11	11	3	13	12	11	11	22	12	18	14	38	34	3	2	2	3	2	1	3	3	3	1	2	3	2	2	1	2	1	1	13	15	9
293	female	16	11	9	12	11	14	11	15	24	16	18	8	43	40	2	2	2	2	2	2	2	2	2	2	2	2	3	1	2	2	2	2	12	12	12
294	female	18	9	8	6	10	7	9	8	19	8	11	12	33	24	2	2	2	2	2	2	2	2	2	2	2	2	2	2	2	2	2	2	12	12	12
295	female	6	13	11	11	14	15	12	8	20	10	19	14	49	35	3	3	2	3	2	2	3	3	2	1	1	3	3	1	1	3	2	2	15	13	12
296	female	15	12	7	5	10	10	10	8	20	10	14	10	34	28	2	2	2	3	2	2	2	2	2	1	2	2	2	1	2	2	2	2	13	11	11
297	female	13	11	6	8	12	11	14	15	22	12	17	13	37	40	2	1	2	3	2	2	2	3	1	2	2	2	3	1	2	1	2	1	12	12	10
298	female	3	9	8	12	10	9	11	11	16	16	20	11	39	31	3	3	1	3	1	1	3	3	3	1	2	2	3	1	1	3	1	1	12	14	10
299	female	10	11	10	9	9	9	10	10	12	11	10	8	39	29	2	3	1	2	1	1	3	2	2	1	2	2	2	1	2	2	1	2	10	12	10
300	female	12	12	10	12	14	11	12	13	22	12	17	13	48	36	2	2	2	3	1	2	2	3	2	2	2	2	3	2	2	2	2	1	12	13	12
301	female	15	8	8	6	8	7	9	9	20	9	14	9	30	25	2	2	2	2	2	2	2	3	1	2	2	2	2	2	2	2	2	2	12	12	12
302	female	7	12	11	6	13	8	11	11	20	13	17	10	42	30	3	3	1	2	2	2	3	3	2	3	2	3	3	1	1	2	1	1	13	16	9
303	female	5	9	7	11	7	8	10	8	19	11	19	8	34	26	2	3	2	3	1	2	3	3	2	1	1	3	3	1	1	2	1	1	13	13	9
304	female	5	15	15	13	15	15	10	11	13	16	20	13	58	36	3	3	1	2	1	1	3	3	3	1	3	3	3	1	1	1	1	1	11	16	8
305	female	22	4	4	3	3	3	9	10	23	8	10	4	14	22	1	2	2	1	2	2	2	1	1	1	1	1	2	2	2	1	2	2	10	7	11
306	female	10	12	12	12	14	12	12	14	18	10	15	8	50	38	2	2	2	3	1	2	2	3	2	1	3	2	2	2	1	2	1	1	12	13	9
307	male	8.26431	9	6	9	13	8	10	13	15	13	19	9	37	31	2.39476	2	1	3	2	2	3	2.49635	2.27983	1.37194	2	2	2	1	1	3	1	1	12.3948	13.1481	9
308	male	9	11	6	9	7	12	15	8	19	10	19	12	33	35	3	2	1	2	1	2	3	3	2	1	2	2	2	2	1	2	2	1	11	13	10
309	male	23	7	10	3	5	10	11	6	16	10	14	4	25	27	1	1	2	2	1	1	1	1	3	1	1	1	2	1	2	1	2	3	8	8	11
310	male	2	15	14	12	13	13	13	13	17	16	20	13	54	39	3	3	1	3	1	1	3	3	3	1	2	3	3	1	1	3	1	1	12	15	10
311	male	3	12	13	13	12	12	14	12	11	11	14	7	50	38	3	3	1	3	1	1	3	3	3	1	2	2	3	1	1	3	1	1	12	14	10
312	male	8	13	12	13	12	12	7	6	18	16	12	9	50	25	3	2	1	3	2	2	2	3	3	1	2	3	1	1	1	3	1	1	13	14	8
313	male	12	12	11	9	12	10	11	9	13	12	14	12	44	30	3	1	1	3	1	3	2	2	3	1	2	2	3	2	1	2	1	1	12	12	10
314	male	8	11	6	6	7	13	9	10	16	14	16	15	30	32	3	3	2	3	1	2	3	3	3	1	2	2	2	1	2	3	1	2	14	14	11
315	male	9	11	11	10	10	9	10	11	17	11	18	9	42	30	3	2	1	3	1	2	2	2	3	1	2	2	3	1	1	2	1	1	12	12	9
316	male	6	9	10	9	7	6	8	9	15	9	12	10	35	23	2	2	1	2	1	1	3	3	3	1	2	3	2	1	1	3	1	1	9	15	9
317	male	12.2798	10	9	10	7	4	9	8	15	11	8	9	36	21	2	2	1	3	2	3	2	3	2.27983	1	2	1	2	2	1	2	1	1	13	11.2798	9
318	male	13	11	8	3	3	3	7	3	13	13	9	8	25	13	2	2	1	1	1	1	2	2	2	2	2	2	2	2	1	3	1	2	8	12	11
319	male	11	9	12	10	11	12	9	10	18	8	12	9	42	31	2	2	1	3	1	2	2	2	3	1	2	3	2	1	1	2	1	2	11	13	9
320	female	15	10	5	3	8	4	7	9	25	13	18	13	26	20	2	1	3	3	3	2	2	3	1	1	2	2	3	1	3	3	3	2	14	11	15
321	female	17.9399	8	11	7	9	7	10	12	21	9	11	10	35	29	2	2	2	2	2	2	2	2	2.27983	2	1	2	2.33998	2	2	2	2	2	12	11.2798	12.34
322	female	15	10.2342	9.86518	9.35217	9.92661	9.76082	10.6781	10.5896	20	10	16	9	39.3782	31.0286	2	2	1	2	2	2	1	3	2	2	1	1	2	1	1	1	1	2	11	10	8
323	female	16	12	10	8	8	6	11	10	20	9	14	11	38	27	2	3	2	3	1	2	1	2	3	2	2	2	2	2	2	3	2	2	13	12	13
324	female	6	13	13	12	15	15	11	14	25	16	20	13	53	40	3	2	2	3	1	2	3	3	2	1	2	3	2	2	1	3	1	1	13	14	10
325	female	7	13	14	7	8	13	14	14	19	6	13	11	42	41	2	1	1	3	2	1	3	2	1	1	2	3	3	1	1	2	1	1	10	12	9
326	female	13	7	10	8	8	11	9	15	25	9	14	10	33	35	3	3	3	2	2	1	2	2	2	1	2	2	3	2	2	1	1	1	14	11	10
327	female	4	14	10	10	7	10	9	12	17	10	15	12	41	31	3	3	1	3	1	2	3	3	2	1	3	3	3	2	1	3	1	2	13	15	12
328	female	16	12	12	10	13	12	11	15	24	12	11.9006	9	47	38	2	2	2	3	2	2	2	2	1	2	2	3	2	2	2	1	2	2	13	12	11
329	female	14	11	10	9	8	7	14	10	16	10	12	9	38	31	2	2	2	3	1	2	2	2	3	1	2	2	2	1	1	2	2	2	12	12	10
330	female	13	9	8	9	9	7	8	9	19	8	14	8	35	24	2	3	2	3	2	2	3	3	3	2	2	2	2	2	2	3	2	2	14	15	13
331	female	10	11	8	4	6	11	11	8	19	15	20	14	29	30	2	2	2	3	2	1	2	3	1	2	2	2	3	1	2	2	2	1	12	12	11
332	female	10	12	14	11	10	14	13	15	19	10	17	15	47	42	2	3	2	3	1	1	3	3	1	2	2	2	2	3	2	1	1	1	12	13	10
333	female	8	11	13	10	10	10	9	11	22	11	16	10	44	30	2	3	2	3	1	1	3	2	1	1	2	2	2	1	1	2	1	2	12	11	9
334	female	19	12	10	6	13	9	9	10	24	12	19	14	41	28	2	2	3	2	2	1	2	2	2	2	2	2	2	2	2	1	2	2	12	12	11
335	female	22	5	8	5	11	12	11	12	22	11	13	9	29	35	3	2	3	2	2	3	2	2	2	3	1	2	2	2	2	1	3	2	15	12	12
336	male	4	15	14	9	14	11	13	13	20	16	20	15	52	37	3	1	1	3	1	1	3	3	3	1	3	3	3	1	1	3	1	1	10	16	10
337	male	13	12	12	10	7	11	11	14	22	15	19	12	41	36	2	2	1	3	2	3	2	2	3	1	1	2	3	2	1	2	1	1	13	11	10
338	male	5	12	11	12	10	13	14	14	20	12	17	13	45	41	3	2	1	3	1	2	3	3	2	1	2	2	3	1	1	3	1	2	12	13	11
339	male	9	12	10	10	9	10	7	9	18	15	15	11	41	26	3	1	1	3	2	2	3	3	2	1	2	2	3	2	1	2	1	2	12	13	11
340	male	5	13	11	11	8	11	7	11	16	13	17	13	43	29	3	3	1	2	1	2	3	2	2	1	2	3	3	1	1	3	1	1	12	13	10
341	male	5	11	12	8	11	12	12	10	18	11	10	9	42	34	3	2	1	3	1	2	3	3	2	1	2	3	3	1	1	3	2	2	12	14	12
342	male	10	10	9	11	6	12	7	14	14	14	17	14	36	33	3	3	1	3	1	2	2	3	3	1	1	1	1	1	1	2	1	2	13	11	8
343	male	13	12	12	13	9	9	7	14	21	11	13	15	46	30	3	3	2	3	2	2	3	2	2	1	2	2	1	2	2	3	1	3	15	12	12
344	male	10	10	11	12	10	11	9	10	14	8	15	12	43	30	2	2	1	3	2	2	2	3	3	1	2	2	3	2	1	3	1	2	12	13	12
345	male	9	10	5	12	11	9	12	9	15	10	19	9	38	30	2	2	1	3	2	1	3	3	2	1	2	2	2	1	2	2	1	2	11	13	10
346	male	13	9	8	5	7	9	6	9	12	14	14	11	29	24	2	3	1	2	2	2	2	2	2	1	2	1	2	1	1	2	1	2	12	10	9
347	male	12	7	6	8	4	7	8	7	13	10	13	10	25	22	2	2	1	3	2	3	3	3	3	2	1	2	3	1	2	3	2	2	13	14	13
348	male	2	6	11	11	10	8	13	8	17	10	15	9	38	29	3	3	1	3	1	1	3	3	3	1	2	3	3	1	1	3	1	1	12	15	10
349	female	10	11	9	9	7	9	8	12	16	8	18	15	36	29	3	2	2	3	2	2	3	3	3	1	2	3	3	2	1	2	2	2	14	15	12
350	female	11	13	11	11	12	12	8	11	20	12	16	12	47	31	3	3	2	2	1	1	2	2	2	1	2	2	2	1	2	2	1	2	12	11	10
351	female	12	8	6	9	7	10	11	12	18	11	15	10	30	33	2	3	1	3	2	2	2	2	2	1	2	2	2	1	1	1	1	2	13	11	8
352	female	12	9	9	6	11	8	12	10	22	12	15	7	35	30	3	2	2	2	2	2	3	3	1	2	1	1	2	1	1	1	2	1	13	11	8
353	female	3	10	7	10	8	6	11	9	19	11	14	8	35	26	3	3	1	3	1	2	3	3	2	1	2	2	3	1	1	3	1	1	13	13	10
354	female	12.6052	12	9	10	10	10	10	9	18	11	14	10	41	29	2.39476	3	2	3	2	2	3	2	2	2	2	2	2	1	2	3	2	2	14.3948	13	12
355	female	10.4635	12	10	11	13	13	12	12	19	11	17	12.2487	46	37	3	2	2	3	2	2	3	3	2.27983	1	3	2.11029	3	2	1.42469	2.13075	2	2	14	14.3901	12.5554
356	female	18	14	7	8	7	6	7	12	21	8	12	8	36	25	2	2	3	3	1	2	2	2	3	2	2	2	2	3	1	1	2	1	13	13	10
357	female	17	11	7	15	10	3	9	6	22	9	19	11	43	18	2	2	2	3	2	2	3	2	3	2	2	2	3	2	2	1	2	2	13	14	12
358	female	12.66	9	8	10	9	9	9	9	20	13	17	10	36	27	2	3	2	2	2	1	2	2	2	2	2	2	2.33998	1	1	2	2	1	12	12	9.33998
359	female	9	11	8	4	8	6	11	8	17.6003	12	15	9	31	25	3	3	1	2	1	2	2	3	2	1	2	2	3	2	2	2	1	2	12	12	12
360	female	6	9	11	9	11	10	12	15	22	12	20	10	40	37	3	3	1	2	1	1	2	3	2	1	2	2	3	1	1	2	1	2	11	12	10
361	female	16	13	9	3	15	12	8	5	19	7	11	10	40	25	2	2	2	3	2	2	2	3	2	2	2	1	2	3	2	3	2	2	13	12	14
362	female	9	9	8	7	11	12	10	13	20	15	19	9	35	35	3	3	1	3	1	2	2	3	2	3	2	3	3	3	1	2	1	2	13	15	12
363	female	13	13	9	11	12	15	13	11	21	10	20	10	45	39	2	2	2	3	2	3	3	3	3	1	2	2	3	2	2	2	2	1	14	14	12
364	female	10	10.4702	10	15	9	9	13	13	16	8	15	7	44.4702	35	2	2	2	3	1	2	2	2	3	1	2	3	3	1	1	2	1	1	12	13	9
365	female	17	11	12	15	13	14	11	12	21	4	17	11	51	37	2	1	2	1	1	3	3	1	3	1	1	2	3	2	2	3	1	1	10	11	12
366	male	4	11	12	15	12	11	13	13	12	9	16	10	50	37	2	3	1	3	1	1	3	3	2	1	2	3	2	1	1	3	1	2	11	14	10
367	male	11	11	12	11	9	10	11	11	19	10	15	8	43	32	3	2	1	3	1	1	3	2	3	1	2	2	1	1	1	2	2	2	11	13	9
368	male	14	11	15	10	15	12	13	14	24	8	18	13	51	39	2	2	2	3	2	2	2	3	3	1	2	2	2	2	1	2	2	2	13	13	11
369	male	10	7	9	10	6	7	9	10	24	8	15	11	32	26	2	2	1	2	1	3	2	3	1	1	1	1	3	1	2	2	1	1	11	9	10
370	male	5	12	8	13	10	8	10	13	22	11	16	10	43	31	3	3	1	3	1	2	3	3	3	1	2	3	3	1	1	2	1	2	13	15	10
371	male	6	13	12	14	12	13	9	14	11	6	11	8	51	36	3	2	1	3	1	1	2	3	2	1	2	2	2	1	1	2	1	1	11	12	8
372	male	6	15	15	15	13	7	12	13	11	8	12	14	58	32	3	2	1	3	1	1	3	3	3	1	2	2	3	2	1	3	1	2	11	14	12
373	male	5	11	13	13	11	13	13	13	18.1418	10.9222	15.0468	10.4006	48	39	3	3	1	3	1	1	3	3	3	1	2	2	2	2	1	3	1	1	12	14	10
374	male	13.3719	11	10	7	10	9	10	11	21	9	14	12	38	30	2	2	1	2	2	2	2	2	2	1.37194	1	2	2	1	2	2	1	1	11	10.3719	9
375	male	14	13	8	4	6	6	9	7	16	9	11	11	31	22	2	2	1	2	1	2	1	2	3	1	2	2	2	1	1	2	1	2	10	11	9
376	male	10	12	9	8	9	12	12	10	14	10	14	14	38	34	2	3	1	2	1	1	2	2	2	1	2	2	2	1	1	2	1	2	10	11	9
377	female	14	11	9	9	10	12	9	11	23	12	18	12	39	32	3	2	2	3	2	2	2	3	3	1	2	2	2	2	2	2	2	2	14	13	12
378	female	14	9	9	10	10	9	9	11	21	12	17	11	38	29	2	2	2	3	2	2	2	3	2	2	2	2	2	1	2	2	2	2	13	13	11
379	female	16	9	5	7	5	12	13	10	19	8	14	10	26	35	2	2	2	3	1	2	2	2	3	2	1	1	2	1	1	2	2	2	12	11	10
380	female	12	12	8	11	7	6	9	9	18	9	15	8	38	24	2	2	2	3	1	2	2	3	3	2	2	2	3	1	2	2	2	1	12	14	11
381	female	15	11	8	6	10	9	10	10	13	11	16	15	35	29	2	2	2	2	2	1	2	3	3	2	2	2	2	2	2	3	2	2	11	14	13
382	female	24	6	9	3	7	6	10	7	22	9	14	15	25	23	3	1	2	2	3	3	2	3	2	3	1	1	2	3	3	2	3	3	14	12	16
383	female	16	12	9	11	10	9	9	13	21	16	17	12	42	31	2	1	2	3	2	3	2	3	2	1	2	2	2	2	2	2	2	2	13	12	12
384	female	12.3719	11	9	7	6	7	8	12	16	10	14	9	33	27	2	3	2	3	2	2	2	3	2	1.37194	2	2	3	2	2	2	2	2	14	12.3719	13
385	female	13	11	11	10	6	7	10	13	19	9	12	11	38	30	2	1	1	1	1	2	3	3	1	1	2	2	2	2	2	2	2	2	8	12	12
386	female	16	9	8	6	7	8	9	9	21	12	15	10	30	26	3	2	2	2	2	2	2	2	2	1	2	2	2	2	2	2	2	2	13	11	12
387	female	19	15	14	13	12	14	14	15	18	11	20	10	54	43	1	1	1	1	1	1	1	1	1	1	1	1	1	2	1	1	1	1	6	6	7
388	female	11	12	13	12	9	10	12	12	17	8	19	12	46	34	3	2	1	3	2	2	3	3	2	2	2	3	2	2	2	2	2	2	13	15	12
389	female	17	10	13	14	15	14	12	12	21	9	12	11	52	38	2	1	2	1	2	2	2	3	1	2	1	2	2	2	2	2	2	2	10	11	12
390	female	27	3	10	7	9	10	11	12	22	7	17	15	29	33	2	1	3	3	3	3	1	2	2	3	1	1	1	3	3	1	2	1	15	10	11
391	female	9	9	6	9	7	12	13	12	18	10	20	13	31	37	2	2	1	3	1	1	2	3	3	1	2	2	2	1	1	1	1	1	10	13	7
392	female	9	9	11	12	12	12	11	11	17	16	16	11	44	34	2	3	2	3	1	2	2	3	3	1	2	2	2	1	1	2	1	1	13	13	8
393	male	0	11	9	12	12	12	11	12	18	10	13	9	44	35	3	3	1	3	1	1	3	3	1	1	3	3	3	1	1	3	1	1	12	14	10
394	male	17	13	13	15	13	13	13.222	9	25	14.8714	20	13	54	35.222	2	2	2	2	2	2	2	2	2	2	2	2	2	1	2	2	2	2	12	12	11
395	male	8	8	13	7	8	5	9	9	18	10	15	9	36	23	3	3	1	3	1	1	2	2	3	1	2	2	3	1	1	2	1	2	12	12	10
396	male	10	4	12	11	6	10	10	9	22	6	12	8	33	29	2	2	1	2	2	2	3	3	1	2	2	2	3	2	2	3	2	1	11	13	13
397	male	7	10	8	9	12	6	12	13	17	16	16	7	39	31	3	2	2	3	2	2	3	3	1	1	2	2	3	2	1	2	1	1	14	12	10
398	male	8	11	11	14	10	10	9	9	17	13	11	10	46	28	3	2	1	3	1	2	3	3	3	1	2	2	1	1	1	3	1	2	12	14	9
399	male	7	14	13	13	14	13	13	13	15	5	11	9	54	39	3	3	1	3	1	2	3	3	3	1	2	3	2	2	1	3	2	2	13	15	12
400	male	9	13	10	7	11	12	11	13	22	15	20	12	41	36	2	3	1	2	1	1	2	3	2	1	2	2	2	2	1	2	1	2	10	12	10
401	male	9	11	5	15	9	8	12	7	17	12	17	9	40	27	2	1	2	3	1	1	3	3	2	1	1	3	3	1	2	1	2	1	10	13	10
402	male	6	12	14	11	10	11	13	8	19	14	16	12	47	32	3	3	2	3	2	1	3	3	3	1	3	3	3	2	1	2	1	1	14	16	10
403	male	6	11	10	12	11	13	15	11	17	12	15	14	44	39	3	3	1	3	1	2	3	2	2	1	2	3	3	1	3	3	1	1	13	13	12
404	male	3	15	11	15	14	15	15	14	16	16	20	16	55	44	3	3	1	3	1	1	3	3	3	1	3	3	2	1	1	3	1	1	12	16	9
405	male	11	8	10	10	8	14	12	10	15	9	15	10	36	36	3	3	3	3	1	1	3	3	3	2	2	3	3	3	2	1	2	1	14	16	12
406	male	6	4	11	9	8	10	12	10	7	7	13	5	32	32	3	3	1	2	1	2	2	3	3	1	2	3	3	1	1	2	1	1	12	14	9
407	male	10.5121	7	4	15	11	11	10	12	24	8	15	11	37	33	2	3	2	2	1.51207	2	3	3	2	1	2	2	3	2	1	1	1	2	12.5121	13	10
408	female	29	3	3	8	3	10	13	8	20	8	10	4	17	31	2	1	3	2	3	3	1	1	1	3	1	1	1	1	2	1	3	3	14	8	11
409	female	12	6	9	11	12	12	10	12	22	6	15	10	38	34	2	3	2	3	2	2	2	3	1	2	2	2	3	2	2	2	2	2	14	12	13
410	female	5	13	13	12	15	11	12	13	25	8	15	12	53	36	3	3	1	2	1	1	3	3	3	1	2	3	3	1	1	2	1	2	11	15	10
411	female	4	14	9	15	14	15	13	11	16	14	20	16	52	39	3	3	1	3	1	2	3	3	3	1	3	3	3	2	1	3	1	1	13	16	11
412	female	27	3	5	3	12	11	8	13	17	12	13	8	23	32	1	1	2	1	3	3	1	2	2	3	1	1	1	2	1	1	2	2	11	10	9
413	female	2	15	13	15	15	15	12	8	21	16	20	16	58	35	3	3	1	3	1	1	3	3	3	1	3	3	3	1	1	3	1	1	12	16	10
414	female	12	15	13	10	10	11	11	14	17	16	20	16	48	36	3	3	2	2	2	2	3	3	3	2	2	3	1	1	2	3	2	2	14	16	11
415	female	4	12	14	15	15	15	15	13	17	14	15	14	56	43	3	3	1	3	1	2	3	3	3	1	2	3	3	2	1	3	1	1	13	15	11
416	female	1	12	11	12	12	9	13	11	22	14	17	9	47	33	3	3	1	3	1	1	3	3	2	1	2	3	3	1	1	3	1	1	12	14	10
417	female	7	15	12	12	15	10	10	11	13	13	17	11	54	31	3	3	2	3	2	1	3	3	2	2	2	3	3	2	2	3	2	1	14	15	13
418	female	15	10	11	11	13	13	14	11	22	16	19	16	45	38	2	2	2	2	2	2	2	3	3	2	1	2	3	2	2	3	2	2	12	13	14
419	female	9	14	14	5	12	8	10	11	20.2694	8	16	12	45	29	3	2	1	3	2	2	3	3	1	2	2	3	1	2	2	2	1	1	13	14	9
420	female	3	15	12	12	13	15	11	11	23	13	18	15	52	37	3	3	1	3	1	2	3	3	3	1	3	3	3	1	1	3	1	1	13	16	10
421	female	15	9	8	8	13	9	11	11	18	15	20	12	38	31	2	2	1	3	1	2	2	1	1	2	2	2	3	2	1	1	2	2	11	10	11
422	female	8	11	7	7	11	7	13	13	16	13	16	11	36	33	3	2	2	3	1	2	2	3	2	1	2	2	3	1	1	1	1	1	13	12	8
423	female	12	14	9	9	12	11	15	12	21	16	20	15	44	38	3	3	2	2	2	2	2	2	1	2	3	3	3	2	2	3	2	2	14	13	14
424	female	12	8	9	11	10	10	10	9	18	12	14	10	38	29	2	3	2	3	2	2	2	3	2	1	2	3	2	2	2	2	2	2	14	13	12
425	male	10	6	7	13	12	12	10	10	14	8	9	4	38	32	3	2	1	3	3	1	1	1	1	1	3	3	2	1	1	3	1	1	13	10	9
426	male	5	10	7	6	7	10	9	8	20	13	17	10	30	27	3	3	1	2	1	1	3	3	2	1	2	2	3	2	1	2	1	1	11	13	10
427	male	9	7	11	6	13	10	13	9	17	13	17	9	37	32	2	3	1	3	1	1	2	3	2	1	1	2	2	2	1	2	1	3	11	11	11
428	male	14	9	7	3	9	4	12	10	12	9	8	6	28	26	2	1	1	1	1	2	2	2	2	1	3	2	2	1	1	1	1	1	8	12	7
429	male	10	12	9	8	7	8	12	8	20	12	19	12	36	28	2	3	1	2	1	2	2	2	2	1	2	2	3	1	1	2	1	2	11	11	10
430	male	8	15	10	15	15	15	7	15	24	16	20	15	55	37	3	2	1	3	1	1	3	2	3	1	1	3	2	1	1	3	1	3	11	13	11
431	male	9	12	14	12	13	9	13	13	16	9	17	11	51	35	2	3	1	3	1	1	2	2	3	1	2	2	2	1	1	3	1	2	11	12	10
432	male	11	10	11	10	10	10	9	9	21	12	15	12	41	28	2	3	1	2	1	1	3	1	3	1	1	2	2	1	1	2	1	1	10	11	8
433	male	10	15	14	15	11	12	9	9	17	11	14	10	55	30	2	2	1	2	1	2	3	2	3	1	2	2	3	1	1	2	1	1	10	13	9
434	male	11	7	9	9	8	5	7	6	16	8	13	9	33	18	3	3	1	3	2	2	3	2	2	2	2	3	1	2	1	2	1	2	14	14	9
435	male	4	11	11	11	13	11	15	11	9	15	13	7	46	37	3	3	1	3	1	2	3	3	3	1	3	3	2	1	1	3	1	1	13	16	9
436	male	13	8	10	9	7	10	8	11	18	11	13	12	34	29	2	2	1	2	1	3	2	2	2	1	2	2	1	1	1	2	1	1	11	11	7
437	male	20	6	7	6	3	3	7	4	20	16	20	16	22	14	2	1	3	3	2	2	2	2	1	2	1	1	2	2	2	3	3	3	13	9	15
438	male	17	9	9	9	9	9	9	9	7	4	5	4	36	27	1	1	2	2	2	2	2	2	2	2	2	2	2	1	1	1	1	1	10	12	7
439	male	8	14	14	13	13	13	14	11	12	16	14	6	54	38	2	3	1	2	1	1	3	3	3	1	2	2	2	3	1	3	1	1	10	14	11
440	male	7	12	11	11	11	13	12	9	18	6	12	10	45	34	3	2	1	3	1	2	3	3	3	1	2	3	3	2	2	2	1	1	12	15	11
441	male	4	15	12	10	12	12	12	10	17	11	14	13	49	34	3	3	1	3	1	1	3	3	3	1	2	2	2	1	1	3	1	1	12	14	9
442	female	15	9	8	6	6	7	9	10	18.1418	10.9222	15.0468	10.4006	29	26	2	2	1	3	1	1	2	1	1	2	2	2	2	2	2	2	2	2	10	10	12
443	female	9	11	5	10	6	9	11	11	22	13	18	11	32	31	2	3	3	3	2	2	3	3	1	1	2	2	3	2	1	3	2	2	15	12	13
444	female	13	9	9	9	9	9	11	9	20	8	13	8	36	29	2	1	1	2	1	1	2	1	1	1	1	2	2	2	1	2	1	1	8	8	9
445	female	13	10	13	10	10	8	11	7	12	5	6	4	43	26	2	3	2	3	2	2	3	2	3	1	2	2	2	2	1	2	1	2	14	13	10
446	female	16	10	11	10	9	9	8	12	13	8	10	8	40	29	2	1	2	3	2	2	2	3	2	2	2	2	2	2	2	2	2	2	12	13	12
447	female	7	11	11	15	11	11	11	14	20	9	20	10	48	36	3	2	2	3	2	1	3	3	2	1	2	3	3	2	1	1	1	1	13	14	9
448	female	9	12	11	4	11	7	8	10	20	7	14	11	38	25	3	3	2	3	1	2	2	3	2	2	2	2	3	1	1	2	2	2	14	13	11
449	female	9	12	11	10	12	12	10	10	19	12	8	10	45	32	2	3	1	2	1	2	2	3	3	1	2	2	2	1	1	2	1	1	11	13	8
450	female	11	13	15	15	15	15	9	14	20	15	19	10	58	38	3	2	3	2	2	2	2	3	3	1	2	2	3	2	1	3	1	1	14	13	11
451	female	6	13	14	15	15	13	11	15	24	12	20	15	57	39	3	3	2	3	2	2	3	3	3	1	2	2	3	1	1	3	1	1	15	14	10
452	female	11	9	8	6	8	9	10	10	11	8	11	7	31	29	2	2	1	2	1	1	2	2	2	1	2	2	2	1	1	2	1	2	9	11	9
453	female	12	9	3	3	5	5	8	3	10	11	7	5	20	16	2	2	1	2	2	2	1	3	2	1	2	2	3	1	1	1	1	2	11	11	9
454	male	8	12	12	13	10	12	9	8	17	9	12	10	47	29	2	2	1	3	1	2	3	3	3	1	2	2	2	2	1	3	1	1	11	14	10
455	male	17	10.2342	9.86518	9.35217	9.92661	9.76082	10.6781	10.5896	18.1418	10.9222	15.0468	10.4006	39.3782	31.0286	1	2	2	2	2	2	2	3	1	2	2	2	1	2	2	2	2	2	11	12	11
456	male	7	12	9	10	11	12	12	9.41736	18	13	11	8	42	33.4174	3	3	1	2	1	2	3	3	1	1	2	2	2	2	1	3	2	2	12	12	12
457	male	4	12	11	11	14	15	11	14	12.78	16	17	15	48	40	3	2	1	3	1	2	3	3	3	1	3	3	3	1	1	3	1	1	12	16	10
458	male	3	13	13	10	13	11	12	11	14	16	20	9	49	34	3	3	1	3	1	2	3	3	3	1	2	3	3	1	1	3	1	1	13	15	10
459	male	2	15	15	15	15	15	10	15	7	7	17	14	60	40	3	3	1	3	1	1	3	3	3	1	3	3	3	1	1	3	1	1	12	16	10
460	male	3	11	13	12	14	15	13	15	14	16	20	11	50	43	3	3	1	3	1	2	3	3	2	1	2	3	3	1	1	2	1	1	13	14	9
461	male	10	11	10	9	10	8	8	7	15	9	14	10	40	23	2	1	1	3	1	2	2	3	2	1	2	2	2	1	1	2	1	2	10	12	9
462	male	13	11	6	8	7	13	11	6	19	12	19	14	32	30	3	3	1	3	1	3	3	3	3	1	3	3	1	3	3	3	2	3	14	16	15
463	male	15	15	13	5	13	8	11	14	15	5	8	13	46	33	2	3	1	3	2	3	1	2	3	2	3	2	3	2	1	3	2	2	14	13	13
464	male	13	10	10	8	9	12	11	12	18	12	18	13	37	35	2	3	2	2	1	2	2	3	3	1	2	2	3	1	2	2	2	3	12	13	13
465	male	7	9	13	11	12	8	10	8	17	6	12	10	45	26	3	3	1	2	1	2	3	2	3	1	2	3	3	1	1	2	1	1	12	14	9
466	male	6.37194	3	3	3	3	3	7	5.86192	7	4	5	4	12	15.8619	3	3	1	3	3	1	3	3	1	1.37194	1	3	1	1	1	1	1	1	14	12.3719	6
467	male	3	15	13	15	15	13	10	13	17	15	20	16	58	36	3	2	1	3	1	1	3	3	3	1	3	3	3	1	1	3	1	1	11	16	10
468	male	5	14	11	10	13	12	12	12	16	15	19	14	48	36	3	3	1	3	1	1	3	3	3	1	2	3	3	2	2	3	1	2	12	15	13
469	male	11	10	12	15	14	13	13	15	14	16	14	10	51	41	3	2	1	2	1	2	3	2	3	1	2	3	2	1	2	2	1	2	11	14	10
470	female	7.88971	6	7	8	9	10	10	13	18	9.83456	13	8.55603	30	33	3	3	1	3	1	2	3	2	2	1	2	2.11029	2	2	1	3	1	2	13	12.1103	11
471	female	17	8	6	6	8	7	10	9	18	12	15	11	28	26	2	2	2	3	1	2	2	1	2	2	2	2	3	2	2	2	2	2	12	11	13
472	female	6	11	12	14	12	15	11	12	23	15	20	13	49	38	2	2	1	3	1	1	3	3	1	1	2	2	3	2	2	2	1	1	10	12	11
473	female	18	8	11	9	9	9	9	9	22	8	15	10	37	27	2	1	2	1	2	2	2	2	2	2	2	2	2	1	1	2	2	2	10	12	10
474	female	26	6	15	3	9	6	9	8	22	11	15	11	33	23	3	1	3	2	3	3	1	2	1	3	1	1	2	2	3	2	3	3	15	9	15
475	female	24	5	8	11	8	12	11	15	21	16	14	10	32	38	2	2	3	1	2	3	2	2	3	2	1	1	2	2	1	1	3	2	13	11	11
476	female	17	4	8	7	4	6	10	8	19	6	6	10	23	24	2	1	2	2	3	2	2	2	1	2	1	2	2	2	1	1	1	1	12	10	8
477	female	16	11	8	8	6	6	13	6	17	5	10	5	33	25	2	2	1	2	3	2	2	2	2	2	2	2	2	2	1	2	1	2	12	12	10
478	female	9	12	15	15	15	15	13	14	20	13	16	9	57	42	2	3	1	3	2	2	3	3	3	1	3	2	2	1	1	2	2	1	13	15	9
479	female	13	11	8	7	5	3	8	6	20	8	16	5	31	17	2	2	1	1	2	1	2	2	1	1	2	2	2	1	1	1	2	1	9	10	8
480	female	14	10	9	3	11	10	13	12	23	9	11	9	33	35	2	3	1	1	1	2	2	2	3	1	2	2	3	1	2	1	2	1	10	12	10
481	female	18	9	7	3	8	9	11	10	19	9	12	9	27	30	2	2	2	2	2	2	2	2	2	2	2	2	2	2	2	2	2	2	12	12	12
482	female	14	7	11	9	11	11	9	11	21	10	19	9	38	31	2	2	2	2	2	1	2	2	2	1	2	2	2	2	1	2	1	2	11	11	10
483	male	3	13	14	11	13	10	11	11	15	9	11	11	51	32	3	2	1	3	1	1	3	3	3	1	2	3	3	1	1	3	1	1	11	15	10
484	male	4	9	11	15	12	10	11	8	9	8	13	10	47	29	3	3	1	3	2	2	3	3	3	1	2	3	3	1	1	3	1	1	14	15	10
485	male	8	6	7	7	13	13	7	9	23	16	18	14	33	29	3	2	1	2	2	1	3	3	2	1	2	2	3	2	2	3	2	1	11	13	13
486	male	9	9	7	12	10	12	13	9	19	11	17	11	38	34	3	3	1	3	1	1	3	2	3	1	2	2	2	2	1	1	1	1	12	13	8
487	male	9	8	5	3	4	3	3	7	22	10	8	7	20	13	3	3	2	3	1	2	3	3	2	2	1	2	3	1	3	3	2	2	14	13	14
488	male	15	11	7	9	9	11	11	10	19	8	16	7	36	32	2	2	2	2	1	2	2	2	3	1	2	2	2	1	1	2	2	2	11	12	10
489	male	7	11	10	9	11	10	11	10	18	11	12	9	41	31	2	3	1	2	1	1	3	3	3	1	2	2	2	2	1	3	1	1	10	14	10
490	male	4	14	15	15	15	9	14	12	16	11	19	11	59	35	2	3	1	3	1	2	3	3	3	1	3	3	3	1	1	3	1	1	12	16	10
491	male	8	9	11	15	10	13	12	13	11	14	11	13	45	38	3	2	1	3	1	2	3	2	3	1	2	2	3	2	1	3	1	1	12	13	11
492	male	14	10	11	10	7	15	13	12	18.1418	10.9222	15.0468	10.4006	38	40	2	3	2	3	2	2	3	2	3	1	2	2	2	2	2	3	2	2	14	13	13
493	male	5	15	10	15	15	13	14	15	25	16	20	16	55	42	2	3	1	3	1	2	3	3	2	1	3	3	3	2	1	3	1	2	12	15	12
494	male	8	9	12	10	15	7	10	12	11	8	15	9	46	29	2	3	1	3	1	2	3	2	2	1	2	2	2	1	1	2	1	1	12	12	8
495	male	7	10	7	4	11	6	9	8	20	5	14	7	32	23	2	3	1	3	1	2	3	3	2	2	2	2	3	1	1	2	1	2	12	14	10
496	male	18	11	9	5	3	5	8	5	12	4	10	8	28	18	2	2	1	2	3	1	3	1	2	1	1	1	1	2	1	3	2	3	11	9	12
497	male	12	11	10	9	11	12	11	9	19	11	16	14	41	32	3	3	2	3	2	2	3	3	3	2	2	2	3	2	2	2	2	2	15	15	13
498	male	23	5	4	3	9	12	9	6	21	11	10	5	21	27	2	2	2	2	2	2	1	2	3	3	2	2	2	2	3	1	3	1	12	13	12
499	male	5	9	9	10	15	10	9	14	18	13	17	12	43	33	3	3	1	3	2	2	3	3	3	1	2	3	3	1	1	3	1	2	14	15	11
500	female	18	9	5	7	10	9	10	12	16	11	16	9	31	31	2	2	2	1	2	1	2	3	2	2	2	2	2	1	2	1	3	3	10	13	12
501	female	13	4	5	7	8	10	11	10	20	9	14	8	24	31	2	2	2	3	2	2	2	3	1	2	2	2	3	2	2	1	1	2	13	12	11
502	female	17	3	3	6	3	3	7	5	16	11	18	16	15	15	2	2	2	3	2	2	2	2	2	2	1	1	2	1	2	2	2	2	13	10	11
503	female	3	14	13	13	13	9	10	12	12	11	15	10	53	31	3	3	1	3	1	1	3	3	3	1	2	3	3	2	1	3	1	1	12	15	11
504	female	3	14	13	10	10	9	13	9	19	9	12	10	47	31	3	2	1	3	1	1	3	3	3	1	2	3	3	1	1	3	1	1	11	15	10
505	female	12.5058	15	12	11	12	14	13	12	17	15	15	8	50	39	3	2	3	2.49424	2	3	2	3	2	1	2	2	2	2	1	2	1	1	15.4942	12	9
506	female	4	15	15	15	15	15	11	15	12	16	19	14	60	41	3	3	1	3	1	2	3	3	3	1	3	3	3	2	1	3	1	1	13	16	11
507	female	11.6518	7	8	8	7	6	8	7	19.2694	8	14	12	30	21	2	2	2	2	1	2	3	3	2.27983	1.37194	2	2	3	2	1	2	2	2	11	13.6518	12
508	female	13	6	13	3	12	14	8	12	22	13	14	10	34	34	3	1	2	2	2	3	2	3	1	1	1	1	2	1	1	1	1	1	13	9	7
509	female	5	9	12	10	9	10	9	11	20	12	12	8	40	30	3	3	1	3	2	2	2	3	1	1	2	3	3	1	2	2	1	1	14	12	10
510	female	11	9	11	8	9	4	10	7	15	8	12	11	37	21	2	3	1	2	1	2	3	2	3	1	2	2	1	2	1	3	1	1	11	13	9
511	female	3	15	14	15	15	11	15	11	16	15	20	13	59	37	3	3	1	3	1	2	3	3	3	1	2	3	3	1	1	3	1	1	13	15	10
512	female	8	6	12	12	12	6	14	14	20	10	11	7	42	34	3	3	2	2	1	2	3	3	2	1	2	3	3	2	1	1	1	2	13	14	10
513	female	8	12	9	9	7	11	10	9	20	14	17	11	37	30	2	2	1	3	2	2	3	3	2	1	1	2	2	1	1	2	1	1	12	12	8
514	female	9	15	13	9	14	12	15	13	23	13	19	11	51	40	3	3	2	3	2	2	3	3	3	1	2	3	3	2	2	3	2	2	15	15	14
515	female	14	4	7	12	10	6	8	11	23	9	16	12	33	25	2	1	2	3	2	2	3	3	3	1	2	2	3	2	1	1	2	2	12	14	11
516	male	7	9	10	3	9	10	14	4	21	15	19	9	31	28	3	3	1	1	1	1	2	3	3	1	1	2	2	1	1	3	1	1	10	12	9
517	male	19	11	7	6	7	7	11	7	23	9	15	8	31	25	1	1	2	2	1	3	2	1	2	1	1	1	2	2	1	2	1	1	10	8	9
518	male	18	10	6	15	11	8	11	7	17.5585	11	15	9	42	26	2	1	2	2	2	2	3	3	2	2	1	1	3	3	2	1	2	2	11	12	13
519	male	16	10	7	4	12	11	11	6	23	13	18	10	33	28	2	1	1	1	1	2	2	2	3	1	2	2	2	1	2	1	1	1	8	12	8
520	male	8.80689	15	7	10	9	15	6	12	7	4	8	10	41	33	3	1	1	3	2	1.80689	3	3	2	1	2	1	1	1	1	3	1	1	11.8069	12	8
521	male	23	7	15	15	15	15	11	15	10	4	5	4	52	41	1	1	1	1	1	2	1	1	1	1	1	1	1	1	2	1	2	3	7	6	10
522	male	12	12	8	7	9	8	8	10	19	12	12	10	36	26	2	2	1	2	1	2	2	2	2	1	2	2	2	1	1	2	1	2	10	11	9
523	male	6	14	15	15	14	12	13	13	12.2694	8	17	10	58	38	3	3	1	3	1	2	3	3	3	1	2	3	2	2	1	3	1	2	13	15	11
524	male	10	4	9	12	12	8	8	14	13	14	17	12	37	30	1	3	1	3	1	2	3	2	2	1	1	2	2	2	1	2	1	1	11	11	9
525	male	18	12	11	12	8	8	7	11	17	9	10	13	43	26	2	1	3	2	2	2	2	3	3	3	2	2	2	2	1	3	2	2	12	15	12
526	male	10	8	13	14	14	15	12	11	13	16	18.3954	14	49	38	3	3	3	3	2	2	3	3	3	1	3	3	3	2	1	2	2	2	16	16	12
527	male	5	15	15	15	15	11	11	9	28	10	20	16	60	31	3	3	1	3	1	3	3	3	2	1	2	3	2	2	1	3	1	1	14	14	10
528	male	16	5	4	5	7.56576	4	6	6	8	4	5	4	21.5658	16	2	3	1	2	2	2	2	2	3	1	2	1	2	2	1	1	1	2	12	11	9
529	male	7	6	8	9	10	6	12	12	19	8	17	10	33	30	2	2	1	3	1	2	3	3	2	1	2	2	3	2	1	3	1	2	11	13	12
530	male	17	7	9	6	9	7	13	12	23	9	12	4	31	32	2	2	2	2	2	2	1	3	2	1	1	1	2	2	2	2	2	2	12	9	12
531	female	15	9	9	10	8	10	9	11	22	10	16	9	36	30	2	2	2	2	1	2	1	2	1	2	1	2	2	2	1	1	1	1	11	9	8
532	female	16	10	11	9	10	10	10	9	18	12	15	8	40	29	2	2	2	2	2	2	3	3	3	2	2	2	2	2	2	2	2	2	12	15	12
533	female	10	3	4	9	3	4	9	5	19	15	19	10	19	18	2	1	1	3	1	1	3	2	1	2	1	2	1	1	1	3	1	2	9	11	9
534	female	8	10	13	11	12	11	12	10	16	10	13	6	46	33	3	2	1	2	1	2	3	3	3	1	2	3	3	1	3	3	1	2	11	15	13
535	female	10	9	13	12	15	15	9	7	16	11	13	11	49	31	3	2	2	2	1	1	3	3	3	2	2	2	1	2	1	3	1	1	11	15	9
536	female	17	6	8	12	9	12	12	13	24	16	20	15	35	37	2	2	2	3	2	2	1	1	2	1	1	1	2	1	1	1	1	1	13	7	7
537	female	10	12	10	7	8	6	9	8	19	8	15	10	37	23	2	3	1	3	1	1	3	2	1	2	2	2	2	1	2	2	2	2	11	12	11
538	female	4	11	11	8	12	9	9	9	19	11	14	9	42	27	3	3	1	3	1	2	3	3	2	1	2	2	3	1	1	2	1	1	13	13	9
539	female	7	9	8	6	11	9	10	11	21	11	16	10	34	30	3	2	2	3	2	1	3	3	2	1	2	3	2	1	2	2	1	1	13	14	9
540	female	11	12	10	10	11	10	12	13	18	12	19	12	43	35	2	2	1	3	1	2	2	2	2	1	2	2	2	1	1	2	1	2	11	11	9
541	female	16	3	3	11	3	3	7	11	24	4	8	4	20	21	3	3	1	2	3	1	2	1	3	1	1	2	2	1	1	1	1	3	13	10	9
542	female	10	13	9	14	15	12	11	15	18	11	14	13	51	38	2	2	1	3	1	2	3	2	3	1	2	2	3	2	1	3	2	1	11	13	12
543	female	9	12	13	15	12	10	10	12	18	14	19	11	52	32	3	2	2	3	2	2	3	3	3	2	2	3	3	2	1	2	1	1	14	16	10
544	female	11	14	7	13	13	13	10	13	23	9	15	13	47	36	3	3	2	2	1	2	2	3	1	1	2	2	3	3	2	1	2	1	13	11	12
545	male	11	15	12	15	10	6	7	5	20	10	17	15	52	18	3	1	2	1	2	2	3	3	2	1	3	3	3	1	3	2	1	1	11	15	11
546	male	21	9	11	9	9	9	9	9	18	11	12	8	38	27	1	2	2	2	2	2	1	2	2	2	2	2	2	3	2	2	2	2	11	11	13
547	male	10	14	10	15	13	13	10	13	19	12	20	13	52	36	3	1	1	3	3	2	3	3	2	2	2	3	3	2	2	3	1	2	13	15	13
548	male	12	8	9	9	6	12	15	13	21	13	16	13	32	40	2	2	1	2	1	2	2	3	2	2	2	2	2	1	2	3	2	2	10	13	12
549	male	0	11	14	15	14	10	10	11	13	11	10	12	54	31	3	3	1	3	1	1	3	3	1	1	3	3	3	1	1	3	1	1	12	14	10
550	male	4	15	15	15	14	15	13.222	12	25	16	20	12	59	40.222	3	3	1	3	1	1	3	3	3	1	3	3	3	3	1	3	1	1	12	16	12
551	male	8	13	11	13	12	13	14	15	24	12	15	11	49	42	2	2	1	3	1	3	3	2	1	1	2	2	2	1	1	3	1	1	12	11	9
552	male	6	15	11	15	7	6	5	11	14	16	18	15	48	22	3	3	1	2	1	1	3	3	3	2	2	2	3	1	1	2	1	1	11	15	9
553	male	4	15	15	15	13	9	14	7	17	11	16	7	58	30	3	2	1	3	1	2	3	3	3	1	2	3	3	1	1	3	1	1	12	15	10
554	male	15	3	3	9	9	9	11	9	20	15	11	11	24	29	2	2	2	3	2	2	2	2	2	2	2	2	2	2	2	3	2	1	13	12	12
555	male	18	4	4	7	6	6	7	5	24	14	20	11	21	18	2	2	2	2	3	2	2	3	3	2	1	2	3	2	2	1	2	2	13	13	12
556	male	20	14	9	6	9	13	7	15	20	8	19	12	38	35	2	2	2	2	2	1	1	2	2	2	2	2	1	2	2	1	2	2	11	11	10
557	male	11	9	7	6	7	13	10	7	22	16	15	10	29	30	3	3	1	2	1	1	2	1	1	1	2	1	2	1	1	1	1	1	11	8	7
558	male	8	10	5	10	9	9	12	9	19	11	17	9	34	30	3	3	1	3	1	2	3	3	3	1	2	2	3	3	1	1	1	1	13	14	10
559	male	4	11	14	15	11	7	14	14	11	10	16	8	51	35	3	2	1	3	1	2	3	3	3	1	2	3	3	1	1	3	1	1	12	15	10
560	female	11	10.3347	12	9	10	10	9	9	22	12	14	8	41.3347	28	2	2	1	2	1	2	2	2	2	1	2	2	3	2	1	2	1	1	10	11	10
561	female	15	13	10	8	13	11	9	9	22	8	16	12	44	29	3	2	2	2	2	1	3	2	1	2	2	2	2	2	2	1	2	2	12	12	11
562	female	9	11	14	7	12	10	9	9	17	7	13	7	44	28	2	3	1	2	1	2	2	3	2	1	2	2	2	1	2	2	1	1	11	12	9
563	female	17	12	8	10	7	13	11	10	23	11	18	13	37	34	3	2	2	3	2	2	2	2	3	2	2	2	2	2	2	2	2	2	14	13	12
564	female	17	10	5	3	3	3	9	7	20	5	12	7	21	19	3	3	2	1	2	2	1	2	1	1	1	1	2	2	1	1	3	1	13	7	10
565	female	6	11	11	9	12	15	14	10	24	11	14	11	43	39	3	3	1	2	1	1	2	3	3	1	2	2	3	1	1	2	1	1	11	13	9
566	female	17	6	6	5	9	6	13	7	22	10	13	12	26	26	2	2	1	1	1	1	1	2	2	2	1	1	2	2	2	1	1	1	8	9	9
567	female	6	10	9	9	5	12	8	9	15	13	14	12	33	29	3	2	1	3	2	2	3	3	2	1	2	3	3	2	1	2	1	1	13	14	10
568	female	12	12	12	12	14	10	11	15	22	10	19	11	50	36	2	1	2	3	1	3	3	3	1	1	2	2	2	1	2	1	2	1	12	12	9
569	female	23	5	8	4	4	11	3	4	20	9	6	5	21	18	2	2	2	3	2	2	1	1	1	2	1	1	1	2	2	1	2	3	13	7	11
570	female	8	9	6	6	7	6	9	9	17	8	15	9	28	24	3	2	1	2	1	1	2	3	2	1	2	2	2	1	1	1	1	1	10	12	7
571	female	14	12	8	10	6	6	10	8	16	11	11	15	36	24	3	3	1	1	2	1	2	1	3	2	2	3	2	2	2	3	1	1	11	13	11
572	female	16	9	4	3	3	4	9	9.86192	25	10	18	11	19	22.8619	2	2	1	2	1	2	2	2	1	2	1	1	3	2	2	1	2	2	10	9	12
573	female	17	8	14	10	13	14	11	15	20	12	20	16	45	40	2	2	2	2	2	2	2	2	1	2	1	1	2	2	2	2	2	1	12	9	11
574	female	12.2617	8	10	9	5	11	15	7	14	9	14	8.55603	32	33	2	2	2	3	2	3	3	3	2	1.37194	1.9341	2.11029	3	2	1	1	1	2	14	13.4163	10
575	male	16	3	7	3	3	3	7	3	7	4	6	6	16	13	3	1	1	3	3	2	1	1	1	1	3	2	3	3	1	3	1	3	13	9	14
576	male	8	12	11	14	9	10	10	10	19	10	16	10	46	30	3	3	1	3	2	2	3	3	3	1	2	2	2	2	1	2	1	1	14	14	9
577	male	18	12	14	7	7	9	8	12	17	9	15	13	40	29	2	3	3	2	1	2	1	2	3	2	2	2	1	1	2	2	2	1	13	12	9
578	male	4	13	8	9	12	13	10	14	17	16	18	11	42	37	3	3	1	2	1	1	3	3	3	1	2	3	3	1	1	2	1	1	11	15	9
579	male	2	14	14	15	14	14	12	12	8	16	20	12	57	38	3	3	1	3	1	1	3	3	3	1	2	3	3	1	1	3	1	1	12	15	10
580	male	1	15	13	13	14	14	14	12	11	12	15	13	55	40	3	3	1	3	1	1	3	3	2	1	3	3	3	1	1	3	1	1	12	15	10
581	male	19	9	8	9	6	10	12	14	19	9	18	7	32	36	3	3	2	2	2	2	1	2	2	2	1	1	2	1	3	1	2	2	14	9	11
582	male	10	11	13	10	11	11	10	11	20	13	15	9	45	32	3	2	2	3	1	2	3	3	3	2	2	2	3	2	2	3	1	2	13	15	13
583	male	5	10	3	3	6	10	6	11	13	12	17	10	22	27	3	3	1	2	1	2	3	3	1	1	2	3	3	2	1	2	2	1	12	13	11
584	male	8	12	12	14	13	13	15	15	27	16	12.0032	10	51	43	3	3	2	3	1	2	3	3	3	1	2	3	3	2	2	2	2	1	14	15	12
585	male	12	12	12	9	12	12	14	13	19	9	17	7	45	39	2	3	1	2	2	2	2	3	3	1	2	1	2	1	2	3	1	2	12	12	11
586	male	7	12	13	10	13	7	11	12	16	10	17	9	48	30	2	3	1	1	1	1	2	3	2	1	3	3	2	1	1	2	1	1	9	14	8
587	male	11	11	12	13	10	10	15	13	14	11	17	10	46	38	2	2	1	3	1	1	3	3	3	1	2	2	2	1	2	1	1	3	10	14	10
588	male	9	10	8	13	8	8	11	9	20	7	13	11	39	28	2	3	2	3	2	2	3	3	3	2	2	3	2	1	1	3	1	2	14	16	10
589	male	20	9	9	9	9	9	9	9	12	8	8	13	36	27	1	3	1	3	2	3	1	1	2	2	1	1	2	3	1	1	1	1	13	8	9
590	female	11	12	11	10	11	12	11	11	17	9	14	9	44	34	3	2	1	2	1	1	2	2	3	2	2	3	2	1	1	2	2	1	10	14	9
591	female	7	11	8	10	10	8	11	10	23	11	17	11	39	29	2	2	2	3	1	2	3	3	1	2	2	2	3	1	1	2	1	1	12	13	9
592	female	5	15	15	11	15	15	11	13	14	16	20	11	56	39	3	2	1	3	1	2	3	3	3	1	3	3	2	1	1	3	1	1	12	16	9
593	female	14	11	10	10	10	9	12	12	21	10	14	16	41	33	2	3	2	2	2	2	3	3	2	2	1	2	3	2	2	2	2	3	13	13	14
594	female	4	9	12	7	12	15	12	14	21	14	20	11	40	41	3	3	1	3	1	1	3	3	3	1	2	2	3	1	1	2	1	1	12	14	9
595	female	5	12	15	15	11	14	14	13	21	6	20	14	53	41	3	3	2	3	1	1	3	3	3	1	2	3	3	1	2	3	2	1	13	15	12
596	female	5	13	11	5	13	7	12	12	12	9	16	5	42	31	2	3	1	2	1	1	2	3	2	1	2	3	3	1	1	3	1	2	10	13	11
597	female	8	11	8	7	11	9	7	9	21	11	16	12	37	25	2	2	2	3	1	1	2	3	2	1	2	2	3	1	2	3	1	2	11	12	12
598	female	6	15	15	8	11	10	7	7	14	12	12	10	49	24	2	3	1	3	1	2	3	3	3	2	2	2	3	1	1	3	1	1	12	15	10
599	female	5	14	12	9	11	11	13	10	18	10	15	13	46	34	3	2	1	3	1	1	3	3	2	1	3	2	3	2	2	3	1	1	11	14	12
600	female	8	9	7	12	8	9	13	9	16	11	15	8	36	31	2	2	1	2	1	2	3	3	1	1	2	2	2	1	1	2	1	2	10	12	9
601	female	17	11	13	9	9	6	13	13	21	12	13	7	42	32	1	2	1	1	2	2	1	3	2	1	1	1	2	2	2	3	1	3	9	9	13
602	female	13	5	3	3	5	7	13	7	24	8	11	8	16	27	2	2	1	2	1	2	2	3	2	1	1	2	1	1	1	1	1	3	10	11	8
603	female	19	14	10	11	9	9	5	10	20	8	13	10	44	24	2	1	2	2	2	2	2	2	1	1	2	2	1	2	2	2	2	3	11	10	12
604	female	18	15	11	3	3	6	14	5	12	7	5	6	32	25	1	3	1	1	1	1	1	1	1	3	1	1	1	1	1	3	1	3	8	8	10
605	male	4	12	14	15	13	15	14	11	7	6	16	11	54	40	3	3	1	3	1	2	3	3	3	1	2	3	3	2	1	3	1	1	13	15	11
606	male	4	12	12	10	13	15	12	11	23	11	14	11	47	38	3	2	1	2	1	1	3	3	3	1	3	3	3	1	1	3	1	1	10	16	10
607	male	16	8	8	8	7	9	3	11	21	9	16	10	31	23	2	1	1	2	2	2	2	2	3	1	1	2	3	1	2	2	2	2	10	11	12
608	male	6	14	14	15	15	15	13	13	23	9	19	12	58	41	3	3	1	3	1	2	3	3	3	1	2	2	2	1	1	2	1	1	13	14	8
609	male	10	15	14	10	11	10	10	12	13	7	14	12	50	32	2	2	1	2	1	2	2	2	2	1	3	3	3	2	1	3	1	2	10	13	12
610	male	5	7	10	9	8	12	11	8	19	5	11	10	34	31	3	3	1	3	1	3	3	3	2	1	2	2	3	1	1	3	1	2	14	13	11
611	male	10	10	12	10	9	8	11	9	14	12	14	8	41	28	2	3	1	2	1	1	2	2	3	1	2	2	2	1	1	2	1	1	10	12	8
612	male	8	13	15	12	14	13	12	13	17	15	20	14	54	38	3	2	2	3	2	1	2	2	1	2	3	3	3	1	1	2	1	1	13	13	9
613	male	11	9	11	3	13	11	9	11	21	9	13	11	36	31	3	2	2	2	1	2	2	3	1	1	2	2	3	2	2	2	2	2	12	11	13
614	male	11	9.42932	13	14	14	7	10	9	19	16	17	13	50.4293	26	2	2	2	3	2	2	3	3	3	1	2	2	3	2	2	2	1	1	13	14	11
615	male	3	7	11	14	11	8	11	8	23	14	18	14	43	27	3	3	1	3	2	2	3	3	1	1	2	3	3	1	2	3	1	1	14	13	11
616	male	7	8	9	9	12	10	11	11	15	9	17	11	38	32	3	3	1	3	1	2	3	2	2	1	3	3	2	1	1	3	2	2	13	14	11
617	male	11	11	15	15	15	15	9	12	24	12	18	14	56	36	3	3	3	3	2	3	3	3	3	2	2	2	3	1	1	3	2	2	17	15	12
618	male	10	3	7	15	7	3	7	3	10	4	5	4	32	13	3	3	1	1	1	2	3	2	1	2	3	3	3	3	1	3	1	3	11	14	14
619	male	7	12	14	10	9	7	11	8	16	10	14	8	45	26	2	3	1	3	1	1	3	2	3	1	2	2	2	1	1	3	1	1	11	13	9
620	female	32	7	3	3	6	12	10	6	23	9	15	9	19	28	2	1	3	1	3	2	1	1	2	3	1	1	2	3	3	1	3	3	12	9	15
621	female	5	11	7	9	8	12	12	11.3103	19	10	16	13	35	35.3103	3	3	1	3	1	2	3	3	3	1	2	2	3	1	1	2	1	1	13	14	9
622	female	8	15	15	15	15	11	15	14	16.2694	12	17	10	60	40	3	2	2	3	3	1	3	3	3	1	2	3	3	1	1	1	1	1	14	15	8
623	female	11	5	8	8	10	8	9	10	19	11	16	11	31	27	2	2	1	3	1	2	2	2	3	1	2	2	3	2	1	2	1	1	11	12	10
624	female	17	9	6	9	11	9	10	13	19	9	14.9006	11	35	32	2	2	2	2	2	2	2	2	1	2	2	2	3	2	2	1	2	2	12	11	12
625	female	11	8	8	4	9	14	7	10	24	12	18	10	29	31	3	2	2	3	2	2	2	3	1	2	2	2	3	1	2	1	2	1	14	12	10
626	female	2	15	13	13	15	13	12	15	22	15	20	10	56	40	3	3	1	3	1	1	3	3	3	1	2	3	3	1	1	3	1	1	12	15	10
627	female	8	9	7	9	7	8	12	11	17	13	18	11	32	31	3	3	1	2	1	2	3	2	3	1	2	2	3	2	1	3	1	1	12	13	11
628	female	20	13	13	6	5	8	10	11	26	6	19	14	37	29	2	2	2	3	3	2	2	3	3	2	1	1	2	2	2	1	2	3	14	12	12
629	female	22	3	7	4	8	9	6	12	21	9	16	14	22	27	3	3	2	2	3	3	2	2	1	3	1	2	2	2	3	1	3	3	16	11	14
630	female	10	13	7	15	12	15	15	15	19	13	20	5	47	45	2	2	1	2	1	2	2	2	2	1	2	2	3	1	1	2	1	1	10	11	9
631	female	2	12	12	12	15	12	11	15	22	9	18	11	51	38	3	3	1	3	1	1	3	3	2	1	2	3	3	1	1	2	1	1	12	14	9
632	female	8	8	9.4659	10	11	10	15	9	21	12	14	10	38.4659	34	3	2	2	3	2	2	3	3	2	1	2	3	3	2	1	2	2	1	14	14	11
633	female	9	12	12	14	15	15	13	11	18	13	19	8	53	39	3	2	2	2	2	3	3	3	3	1	2	3	3	2	1	3	1	1	14	15	11
634	female	21	9	12	5	7	9	11	15	25	9	11	11	33	35	1	1	2	1	2	3	2	2	2	1	2	2	2	2	3	1	1	1	10	11	10
635	male	2	10	10	13	14	13	11	12	10	16	17	11	47	36	3	3	1	3	1	1	3	3	3	1	2	3	3	1	1	3	1	1	12	15	10
636	male	8	11	10	9	9	10	12	9	15	9	5	6	39	31	2	3	1	3	1	2	2	3	3	1	2	2	3	1	1	2	1	2	12	13	10
637	male	17	12	8	6	8	6	8	10	20	10	14	10	34	24	2	2	1	2	1	2	2	1	2	1	2	2	2	1	2	1	1	3	10	10	10
638	male	15	3	3	4	3	4	7	4	13	4	5	4	13	15	2	3	2	2	2	2	2	3	2	2	2	2	2	1	2	2	2	3	13	13	12
639	male	13	12	14	6	11	7	8	6	20	10	11	12	43	21	3	3	2	3	1	3	2	3	1	1	2	2	2	2	2	1	2	3	15	11	12
640	male	14	14	11	10	7	5	7	13	21.5258	16	18	13	42	25	3	2	1	3	1	3	3	1	1	2	2	1	1	1	1	1	1	1	13	10	6
641	male	9	11	15	15	11	3	7	14	7	4	5	4	52	24	2	3	1	3	1	1	3	1	3	1	3	3	1	1	1	3	1	1	11	14	8
642	male	4.48434	15	15	15	15	15	14	14	21	14	20	16	60	43	3	3	1	3	1	1	3	3	3	1	1.9341	2.11029	2.33998	1.50993	1.42469	3	1	1	12	14.0444	10.2746
643	male	11	11.8995	10	9	13	13	12	10	18	14	13	8	43.8995	35	3	1	1	3	1	2	2	2	1	1	2	2	1	1	1	1	1	1	11	10	6
644	male	6	15	15	15	15	15	11	15	21	12	15	12	60	41	3	3	1	3	1	2	3	3	3	1	2	2	2	1	1	2	1	1	13	14	8
645	male	23	10	9	8	6	3	8	11	11	16	15	12	33	22	2	2	3	3	3	3	1	2	3	3	2	1	2	1	1	2	3	2	16	12	11
646	male	4	15	14	15	15	15	14	13	16	12.5983	20	16	59	42	3	3	1	3	1	2	3	3	2	1	3	3	2	2	1	3	1	1	13	15	10
647	male	16	15	11	8	6	9	6	7	15	10	20	16	40	22	2	3	3	2	3	1	2	3	3	2	2	2	3	1	2	3	3	3	14	14	15
648	male	9	15	9	12	12	10	9	9	21	12	15	12	48	28	2	3	1	2	1	2	2	3	2	1	2	2	2	2	1	2	1	1	11	12	9
649	male	13	8	9	5	6	6	8	7	16	9	11	9	28	21	2	2	1	3	2	1	2	2	2	1	1	2	1	2	1	2	1	2	11	10	9
650	male	21	6	9	10	5	8	13	6	9	8	7.39537	4	30	27	1	3	1	2	1	2	1	1	3	2	1	1	1	2	2	3	1	3	10	9	12
651	female	15	12	10	6	10	10	11	9	17	6	12	8	38	30	2	2	2	2	1	2	2	2	2	1	2	2	2	2	2	2	2	1	11	11	11
652	female	15	9	14	13	14	15	12	15	24	9	8	8	50	42	2	2	2	2	1	2	1	2	3	1	2	1	3	1	1	1	1	1	11	10	8
653	female	4	13	12	15	11	10	13	12	13	12	17	13.2487	51	35	3	3	1	3	1	1	3	3	3	1	2	2	3	1	1	3	1	2	12	14	11
654	female	20	13	15	5	14	7	11	15	26	10	10	8	47	33	1	2	3	2	3	3	1	3	1	3	2	2	1	2	1	1	1	1	14	12	7
655	female	7	15	13	10.2437	15	6	8	6	13	8	11	10	53.2437	20	3	2	1	3	1	1	3	1	2	1	2	3	2	1	1	3	1	1	11	12	9
656	female	12	6	9	7	10	10	8	10	20	13	19	12	32	28	2	3	2	2	2	1	2	3	2	2	2	2	3	2	1	2	2	2	12	13	12
657	female	20	12	9	6	4	4	11	6	13	6	14	12	31	21	2	2	3	3	3	2	2	1	2	2	2	1	3	2	2	3	3	1	15	10	14
658	female	12	7.42932	9	11	11	9	8	10	20	10	12	8	38.4293	27	2	2	2	3	1	2	2	3	1	2	2	2	3	2	2	1	2	1	12	12	11
659	female	15	9	8	7	6	8	6	7	15	11	13	9	30	21	2	3	1	3	2	2	2	2	1	2	1	1	2	2	2	1	1	2	13	9	10
660	female	11	10	7	4	7	11	7	10	16	12	19	8	28	28	2	2	1	1	2	2	3	3	2	1	2	2	3	1	1	2	2	2	10	13	11
661	female	19	12	11	8	12	9	10	12	19	8	10	8	43	31	2	2	2	1	2	2	2	2	2	2	2	1	2	1	2	2	2	2	11	11	11
662	female	14	10	8	9	9	9	11	15	20	14	15	10	36	35	2	2	2	3	2	2	2	3	2	2	2	2	2	2	1	2	2	2	13	13	11
663	female	2	15	11	15	11	3	7	5	7	6	8	9	52	15	3	3	1	3	1	1	3	3	3	1	3	3	3	1	1	3	1	1	12	16	10
664	female	17	12	8	6	9	8	11	12	25	12	15	13	35	31	2	2	2	3	2	3	2	2	1	2	2	2	2	1	2	1	2	2	14	11	10
665	female	3	9	11	6	9	9	9	10	17	11	11	10	35	28	3	3	1	3	1	1	3	3	3	1	2	2	3	1	1	3	1	1	12	14	10
666	male	17	10	10	3	6	10	10	10	20	15	13	9	29	30	2	2	2	3	2	2	2	2	3	2	2	2	2	2	1	2	1	3	13	13	11
667	male	2	15	15	15	15	15	14	15	13	13	17	13	60	44	3	3	1	3	1	1	3	3	3	1	3	3	3	1	1	3	1	1	12	16	10
668	male	7	9	11	9	10	9	11	9	19	12	15	7	39	29	2	2	1	2	1	1	2	3	2	1	2	2	3	1	1	2	1	1	9	12	9
669	male	10	11	10	11	11	8	9	7	24	12	12	9	43	24	2	2	1	3	2	3	3	3	2	1	2	2	3	2	1	2	1	2	13	13	11
670	male	12	12	10.8831	6	6	6	13	11	9	4	7	5	34.8831	30	2	2	1	3	1	2	2	2	3	1	2	2	2	1	1	2	1	2	11	12	9
671	male	15	9	12	6	11	6	10	7	18	6	13	8	38	23	2	3	1	2	3	2	2	2	2	2	2	2	2	1	2	2	1	2	13	12	10
672	male	18	9	7	9	12	10	10	10	19	12	15	12	37	30	2	2	2	2	2	3	3	2	2	2	2	2	3	2	2	1	2	2	13	13	12
673	male	8	12	11	8	8	6	11	11	20	12	13	8	39	28	3	3	1	3	1	1	2	2	3	1	2	2	2	1	1	2	1	1	12	12	8
674	male	15	9	10	8	7	6	8	6	13	14	9	9	34	20	2	3	1	3	2	3	2	2	2	2	2	2	2	1	2	2	2	2	14	12	11
675	male	22	4	7	11	4	8	5	10	23	5	7	6	26	23	2	2	2	1	2	2	1	2	3	3	1	1	1	1	1	1	2	1	11	11	7
676	male	17	9	10	7	5	7	9	7	22	12	10	9	31	23	2	2	2	2	2	2	2	2	2	2	1	1	2	1	1	1	2	1	12	10	8
677	male	9	11	13	8	15	15	15	11	16	12	14	11	47	41	2	2	1	3	1	2	3	3	3	1	2	1	3	2	1	3	1	2	11	13	12
678	male	10	12	14	11	12	13	11	13	18	8	11	10	49	37	3	2	1	3	1	2	2	3	2	1	2	2	2	2	2	2	1	2	12	12	11
679	male	13	8	9	8	10	9	13	9	9	16	20	14	35	31	2	2	1	3	1	3	2	3	3	1	2	2	2	2	1	2	1	3	12	13	11
680	male	15.5121	9	11	6	8	9	11	8	18	12	16	9	34	28	2	2	2	2	1.51207	1	2	3	2	1	1	1	2	2	2	1	2	2	10.5121	10	11
681	female	4	10	14	10	6	11	9	12	20	14	14	13	40	32	3	3	1	3	1	2	3	3	1	1	2	2	3	2	1	3	1	2	13	12	12
682	female	3	10	7	11	12	12	7	11	21	11	19	12	40	30	3	3	1	3	1	1	3	3	3	1	2	3	3	1	1	2	1	1	12	15	9
683	female	5	10	9	6	11	7	9	11	16	12	17	10.556	36	27	3	3	2	3	2	2	2	3	1	1	2	2	3	1	1	3	1	1	15	11	10
684	female	17	13	12	11	12	12	14	12	22	15	20	9	48	38	2	1	2	3	2	2	2	2	1	2	2	1	2	3	1	2	2	1	12	10	11
685	female	23	9	9	9	5	7	10	14	21	13	17	13	32	31	2	2	2	3	3	2	2	1	1	3	1	1	2	2	2	1	2	3	14	9	12
686	female	27	3	9	3	7	3	11	11	25	4	5	4	22	25	1	1	2	3	3	3	2	1	1	3	1	1	2	3	2	1	2	3	13	9	13
687	female	6	8	9	9	9	8	11	8	19	10	16	9	35	27	3	3	2	3	1	2	3	3	2	1	2	2	3	2	1	2	1	1	14	13	10
688	female	4	8	12	9	14	8	12	13	11	14	14	4	43	33	2	3	1	3	1	2	3	3	2	1	2	3	3	1	1	2	1	1	12	14	9
689	female	8	13	8	10	10	13	9	10	18	13	17	15	41	32	2	2	1	3	1	2	2	3	2	1	2	2	2	1	1	2	1	1	11	12	8
690	female	7	12	11	13	9	12	14	13	14	9	18	10	45	39	2	3	2	2	1	2	3	3	3	1	2	2	3	1	1	3	1	1	12	14	10
691	female	6	14	5	10	9	9	12	15	25	12	9	6	38	36	3	3	2	3	1	1	3	3	2	1	2	3	1	1	2	2	1	1	13	14	8
692	female	13	12	8	9	12	15	13	9	16	10	15	9	41	37	2	2	2	3	2	1	2	3	2	1	2	2	2	2	2	2	2	2	12	12	12
693	female	6	12	7	6	10	12	11	10	17	12	17	11	35	33	3	3	2	3	1	2	3	3	2	1	3	3	3	2	2	3	2	1	14	15	13
694	male	9	15	15	15	14	14	11	14	18	15	14	12	59	39	2	2	1	3	1	2	2	3	3	1	2	2	2	1	1	3	2	1	11	13	10
695	male	5	12	10	8	11	8	13	10	19	13	20	13	41	31	2	3	1	3	1	1	2	3	2	1	3	2	3	1	1	2	1	1	11	13	9
696	male	17	7	7	4	5	4	12	6	16	6	14	6	23	22	2	2	1	1	1	2	2	2	2	2	1	1	2	1	1	1	2	2	9	10	9
697	male	13	7	5	8	7	7	10	9	23	9	18	9	27	26	3	2	1	3	1	2	3	2	3	1	2	2	2	2	2	1	1	2	12	13	10
698	male	6	15	14	15	14	15	12	15	13	15	14	13	58	42	2	3	1	3	1	2	3	3	3	1	2	2	2	1	1	3	1	1	12	14	9
699	male	12	6	9	9	11	10	8	8	19	12	15	11	35	26	2	3	2	3	2	2	2	3	2	1	2	2	3	2	2	2	2	2	14	12	13
700	male	19	10.2342	9.86518	10.097	9	9	9	9	20	12	15	12	39.1964	27	2	2	2	2	2	2	2	2	2	2	2	1	1	1	2	2	2	2	12	11	10
701	male	15	14	5	5	9	6	12	9	17	8	15	8	33	27	2	3	2	1	2	2	2	3	2	2	2	2	2	2	1	1	2	1	12	13	9
702	male	20	12	8	7	6	6	7	9	18	11	10	11	33	22	1	1	2	2	3	2	3	3	3	2	1	3	1	2	2	1	2	2	11	15	10
703	male	9	6	11	10	5	3	8	3	7	4	8	5	32	14	2	3	1	2	2	1	3	2	3	1	2	2	2	1	1	3	1	1	11	13	9
704	male	9	11	11	9	13	10	9	10	18	9	12	9	44	29	2	3	1	2	1	2	2	3	3	1	2	2	2	1	1	2	1	1	11	13	8
705	male	6	14	7	15	7	15	15	15	13	10	17	12	43	45	2	3	1	3	1	1	3	3	3	1	1	3	3	3	1	3	1	2	11	14	13
706	male	11.6159	7	7	8	8	10	9	10	19.6003	10	11	9	30	29	2.39476	2	1	2.49424	1.51207	1	2	2	2.27983	1.37194	2	2.11029	2.33998	1.50993	1	2.13075	1.41213	2	10.4011	11.7621	10.3928
707	male	6	12	13	7	9	7	11	11	18	11	15	9	41	29	2	3	1	3	1	2	3	3	3	1	2	3	2	2	1	3	1	1	12	15	10
708	male	10	4	8	14	6	11	9	11	22	8	18	13	32	31	3	3	2	2	3	2	3	3	2	3	1	2	3	1	1	3	2	1	15	14	11
709	male	14	7	9	6	10	10	11	12	23	11	19	13	32	33	2	3	1	2	1	3	2	2	3	1	2	2	2	2	1	2	1	2	12	12	10
710	female	17	6	4	6	8	9	11	5	21	16	20	13	24	25	2	2	2	2	2	2	2	3	2	2	1	1	3	2	2	1	2	2	12	11	12
711	female	20	9	15	13	4	9	11	14	22	5	11	8	41	34	2	2	2	3	2	2	2	2	3	2	2	2	1	2	2	1	2	2	13	13	10
712	female	10	12	15	12	14	14	12	14	15	6	17	10	53	40	3	3	2	3	2	2	3	3	3	2	3	2	3	1	2	3	2	2	15	16	13
713	female	14	11	6	5	5	5	8	5	21.7785	6	15	10	27	18	2	1	2	3	2	1	2	3	1	2	1	1	2	1	2	2	2	2	11	10	11
714	female	7	12	9	11	12	7	11	12	17	16	19	9	44	30	2	2	1	3	1	2	3	3	2	1	2	3	2	1	1	1	1	1	11	14	7
715	female	11	13	11	14	11	7	7	5	13	10	18	16	49	19	3	2	2	3	3	2	3	2	3	1	2	2	3	2	1	3	1	1	15	13	11
716	female	18	6	7	7	11	5	8	6	19	13	19	8	31	19	2	2	3	3	2	2	3	2	1	2	2	2	2	2	2	1	3	2	14	12	12
717	female	9	12	12	10	11	10	10	14	24	13	20	11	45	34	2	3	1	3	1	2	2	3	2	1	2	2	3	2	2	2	1	2	12	12	12
718	female	5	12	11	9	12	8	12	12	13	16	18	8	44	32	3	3	1	2	1	1	2	3	2	1	2	2	3	1	1	2	1	1	11	12	9
719	female	12	9	10	10	9	7	9	9	15	8	15	10	38	25	2	2	1	2	1	2	2	2	2	1	1	2	1	1	1	2	1	1	10	10	7
720	female	10	7	8	10	5	5	12	11	24	11	18	7	30	28	3	2	1	2	1	2	2	2	1	1	1	2	3	1	3	2	1	1	11	9	11
721	female	27	6	7	5	7	5	11	8	23	8	17	15	25	24	2	2	1	2	3	2	2	1	3	3	2	1	1	2	2	1	3	3	12	12	12
722	female	10	7	8	6	6	6	8	7	20	12	15	9	27	21	2	2	1	2	1	1	2	2	2	2	1	2	3	1	1	2	1	1	9	11	9
723	female	16	13	6	6	3	12	11	12	20	9	19	16	28	35	3	2	2	3	2	2	2	3	3	2	2	1	2	2	2	2	2	2	14	13	12
724	female	11.209	10	13	3	9	9	10	9	25	12	9	10	35	28	2.39476	2.32255	1.49269	2.49424	1.51207	1.80689	2.40084	2.49635	2.27983	1.37194	1.9341	2.11029	2.33998	1.50993	1.42469	2.13075	1.41213	1.58498	12.0232	12.5934	10.4025
725	male	13	9	6	7	7	8	12	10	14	10	9	10	29	30	3	2	1	2	2	2	2	3	3	1	2	1	2	1	2	2	1	2	12	12	10
726	male	10	9	9	15	12	13	11	11	13	9	16	11	45	35	1	1	1	3	1	2	3	3	3	1	2	3	1	2	1	3	1	1	9	15	9
727	male	8	10	10	9	10	10	9	9	15	7	13	8.77532	39	28	2	2	1	2	1	3	3	3	3	1	2	3	2	1	1	3	1	1	11	15	9
728	male	14	10	9	3	11	10	12	13	17	11	15	7	33	35	2	2	1	1	1	2	1	3	3	1	2	2	2	1	2	2	2	1	9	12	10
729	male	14	10	7	4	9	9	9	7	16	9	13	8	30	25	2	2	1	1	1	2	2	3	3	1	2	1	2	1	1	2	1	3	9	12	10
730	male	10	12	11	10	13	10	10	12	8	8	9	4	46	32	2	3	1	2	1	3	3	3	3	1	2	2	2	2	1	3	1	2	12	14	11
731	male	15	12	9	4	8	7	7	9	15	7	13	8	33	23	3	3	2	2	2	3	2	2	3	1	2	2	2	1	1	1	2	1	15	12	8
732	male	10	12	11	10	12	12	10	12	18	15	14	8	45	34	3	3	2	3	2	2	2	2	2	1	2	2	2	2	1	3	1	1	15	11	10
733	male	16	3	7	7	9	9	9	9	22	12	16	9	26	27	2	2	2	2	3	2	2	2	1	1	1	1	3	1	3	1	1	1	13	8	10
734	male	4	9	12	9	7	15	13	14	17	13	20	11	37	42	3	3	1	3	2	1	3	3	3	1	1	3	3	1	1	2	1	1	13	14	9
735	male	12	7	7	10	7	10	10	10	20	11	17	11	31	30	2	2	2	2	1	2	2	2	2	1	1	2	3	1	1	2	1	2	11	10	10
736	male	12	15	7	15	7	3	7	11	7	7	14	16	44	21	2	2	1	2	1	2	2	2	1	2	2	2	2	1	2	2	1	1	10	11	9
737	male	11	10	13	15	15	15	13	15	20	4	12	10	53	43	2	2	2	3	1	2	3	3	2	2	2	2	2	1	2	3	2	2	12	14	12
738	male	5	9	10	7	6	9	8	10	18	9	12	8	32	27	2	3	1	3	1	1	3	3	2	1	2	2	2	1	1	2	1	1	11	13	8
739	male	7	8	8	9	8	9	10	14	17	10	16	8	33	33	3	3	1	3	1	2	3	3	3	1	2	2	2	1	1	1	1	1	13	14	7
740	female	7	13	13	9	12	10	12	10	25	12	14	11	47	32	3	3	3	3	1	1	3	3	3	3	2	3	3	1	1	2	1	1	14	17	9
741	female	8	6	8	7	10	7	12	11	23	7	13	6	31	30	2	3	1	3	1	2	2	2	1	1	2	2	2	1	1	2	1	1	12	10	8
742	female	12	6	10	12	10	8	9	11	23	11	15	14	38	28	2	3	2	2	1	2	2	2	1	1	2	2	2	1	2	2	2	1	12	10	10
743	female	2	14	11	13	15	11	12	11	23	15	17	13	53	34	3	3	1	3	1	1	3	3	3	1	2	3	3	1	1	3	1	1	12	15	10
744	female	14	11	8	9	11	9	11	9	14	11	11	9	39	29	2	2	2	3	1	2	2	2	1	1	2	2	3	2	2	1	2	2	12	10	12
745	female	19	11	13	15	15	15	11	15	17	15	20	12	54	41	2	2	3	3	2	2	2	2	3	2	2	2	2	2	1	1	2	2	14	13	10
746	female	13	10	10	11	11	10	10	15	17	9	12	7	42	35	2	2	2	2	1	2	2	2	2	1	2	2	3	2	1	2	2	1	11	11	11
747	female	5	10	12	7	11	13	10	12	22	12	18	12	40	35	3	2	1	3	1	2	3	3	2	1	2	2	3	1	1	2	1	1	12	13	9
748	female	17	7	8	6	8	6	9	8	23	8	12	8	29	23	2	2	2	2	2	2	2	2	2	2	2	2	2	2	1	2	2	2	12	12	11
749	female	9	8	5	6	14	11	9	12	23	11	16	13	33	32	2	3	1	3	2	2	3	3	3	1	2	2	3	2	1	1	1	1	13	14	9
750	female	13.5058	9	10	7	6	6	8	9	18	10	13	8	32	23	2	1	2	2.49424	1	2	2	2	2	1	2	2	3	1	2	1	1	1	10.4942	11	9
751	female	12.3719	7	6	8	4	4	6	5	12	12	16.9673	13	25	15	3	2	1	3	1	2	2	1	1	1.37194	2	2	2	3	1	2	1	1	12	9.37194	10
752	female	16	12	10	12	13	10	9	10	21	10	20	13	47	29	3	2	2	3	2	2	2	2	2	2	2	2	2	2	2	2	2	2	14	12	12
753	female	11	11	9	5	10	5	7	8	18	10	15	10	35	20	2	2	2	3	2	2	2	3	3	1	2	2	3	2	2	3	1	1	13	13	12
754	male	6	15	9	6	6	5	9	6	25	12	16	14	36	20	2	3	1	3	1	1	3	3	2	1	2	2	2	1	1	2	1	2	11	13	9
755	male	10	10	10	9	9	9	11	9	7	12	15	10	38	29	2	2	1	2	2	2	2	3	1	1	2	2	2	1	1	2	1	2	11	11	9
756	male	5	15	9	13	12	15	13	11	17	13	20	12	49	39	3	2	1	3	1	2	3	3	2	1	1	3	2	2	1	3	1	1	12	13	10
757	male	7	10	12	10	10	10	12	10	17	10	14	9	42	32	3	3	1	3	1	2	3	3	3	1	2	2	3	2	1	2	1	2	13	14	11
758	male	5	11	11	10	13	11	15	9	19	8	9	8	45	35	3	2	1	3	1	1	3	3	3	1	2	3	1	1	1	3	1	1	11	15	8
759	male	18	9	8	6	10	10	9	9	17	7	9	7	33	28	2	1	1	2	2	1	2	2	3	2	2	1	2	1	3	2	1	2	9	12	11
760	male	10	3	7	5	8	8	7	5	14	8	13	8	23	20	2	3	1	3	1	1	2	2	2	2	1	2	2	1	1	2	1	2	11	11	9
761	male	16	4	7	6	8	4	9	5	9	9	10	7	25	18	2	2	1	1	1	2	2	2	3	1	2	2	2	2	2	2	1	2	9	12	11
762	male	11	8	11	9	11	10	12	11	24	12	15	10	39	33	2	2	1	1	1	2	2	2	2	1	2	3	2	1	1	2	1	1	9	12	8
763	male	23	11	9	3	8	9	11	9	23	9	11	9	31	29	3	2	3	2	3	2	2	2	2	2	2	1	1	2	2	2	3	3	15	11	13
764	male	5	12	9	6	7	6	9	8	20	16	17	13	34	23	3	3	2	3	2	1	3	3	2	1	2	3	3	2	2	3	1	1	14	14	12
765	male	7	15	12	6	7	14	13	15	15	16	20	10	40	42	3	3	2	3	2	2	3	3	3	1	3	3	2	1	1	3	1	2	15	16	10
766	male	11	12	15	15	15	11	12	10	15.2694	12	14	9	57	33	2	2	1	3	1	2	3	2	3	1	2	2	2	2	1	2	1	1	11	13	9
767	male	7	7	9	10	12	8	11	11	16	12	10	9	38	30	3	3	1	3	1	2	3	2	3	1	2	2	3	1	1	2	1	1	13	13	9
768	male	6	12	10	12	12	14	11	12	17	12	17	14	46	37	3	3	1	3	1	1	3	2	3	1	3	2	3	1	1	2	1	1	12	14	9
769	male	16	15	11	9	11	13	13	15	15	15	14	12	46	41	2	2	2	3	2	3	3	3	3	2	2	2	2	2	2	2	2	2	14	15	12
770	male	17	7	10	6	6	12	5	11	23	5	18	11	29	28	2	2	2	3	1	2	2	2	1	1	1	1	1	2	2	1	1	3	12	8	10
771	female	16	10	8	12	10	9	12	12	22	11	13	9	40	33	2	3	3	3	1	3	2	2	2	1	2	2	2	2	1	1	2	2	15	11	10
772	female	10	12	13	5	12	14	15	14	20.7785	13	16	13	42	43	3	2	1	3	1	1	2	2	3	1	2	2	3	1	3	2	1	1	11	12	11
773	female	22	7	7	6	6	9	13	11	21	13	14	9	26	33	2	1	2	1	2	2	1	2	2	2	1	1	2	2	2	2	2	2	10	9	12
774	female	5	6	11	15	13	13	14	11	21	13	20	12	45	38	2	3	1	3	1	2	3	3	1	1	2	2	2	1	1	2	1	1	12	12	8
775	female	11	7	8	8	10	3	14	12	21	10	18	11	33	29	3	1	2	3	2	2	3	3	2	2	1	2	2	2	2	3	1	1	13	13	11
776	female	14	5	3	6	5	6	11	5	24	8	17	4	19	22	2	2	1	3	2	2	2	2	2	1	2	2	2	2	1	1	2	1	12	11	9
777	female	4	15	13	8	13	11	15	11	20	14	19	11	49	37	3	3	1	3	1	1	3	3	3	3	3	3	3	1	1	3	1	1	12	18	10
778	female	6	11	9	10	11	15	10	15	22	14	20	14	41	40	3	2	2	3	1	1	3	3	2	2	2	3	2	1	1	2	1	1	12	15	8
779	female	3	10	9	9	7	8	9	9	19	9	14	12	35	26	3	3	1	3	1	1	3	3	2	1	2	3	3	2	1	2	1	1	12	14	10
780	female	23	11	15	11	10	12	10	13	15	15	20	16	47	35	2	2	1	2	3	2	1	2	1	3	2	1	2	3	3	3	3	3	12	10	17
781	female	11	5	5	7	7	9	12	10	22	6	16	10	24	31	2	3	2	2	1	1	2	3	2	2	2	2	3	1	2	1	2	1	11	13	10
782	female	2	15	15	13	12	13	13	14	12	8	18	12	55	40	3	3	1	3	1	1	3	3	3	1	3	3	3	1	1	3	1	1	12	16	10
783	female	26	7	4	3	5	6	8	3	21	14	12	9	19	17	2	2	2	1	3	3	2	2	2	3	2	1	2	3	3	2	2	3	13	12	15
784	female	5	13	10	8	11	13	14	13	22	16	16	14	42	40	3	3	1	3	1	1	3	3	3	3	2	3	3	1	1	2	1	1	12	17	9
785	female	3	15	15	15	15	15	12	15	13	14	20	11	60	42	3	3	1	3	1	2	3	3	3	1	3	3	3	1	1	3	1	1	13	16	10
786	female	5	11	7	10	10	11	10	15	20	12	19	13	38	36	2	3	2	3	1	1	3	3	3	1	2	3	3	2	1	3	1	1	12	15	11
787	male	7	15	14	12	14	14	14	13	26	16	20	12	55	41	3	3	3	3	1	1	3	3	3	1	2	3	2	1	1	1	1	1	14	15	7
788	male	12.0178	9	9	9	9	9	9	9	10	12	15	9	36	27	2	2	2	2.49424	1.51207	2	3	3	3	2	2	3	2	2	2	3	1	2	12.0063	16	12
789	male	6	10	9.4659	8	7	10	12	9	19	11	14	15	34.4659	31	3	3	1	2	2	2	3	3	3	1	2	2	3	1	1	3	1	1	13	14	10
790	male	6	14	10	10	7	9	13	11	20	16	20	15	41	33	3	3	1	3	1	3	3	3	3	1	3	3	3	3	1	3	1	1	14	16	12
791	male	2	15	15	15	15	15	11	15	13	4	20	16	60	41	3	3	1	3	1	1	3	3	3	1	3	3	3	1	1	3	1	1	12	16	10
792	male	6	12	10	12	10	12	9	10	19	12	15	12	44	31	2	3	1	2	1	1	2	3	2	1	2	2	3	1	1	2	1	1	10	12	9
793	male	3	14	10	6	14	12	12	10	15	16	20	12	44	34	3	2	1	3	1	3	3	3	1	1	2	3	3	1	1	3	1	1	13	13	10
794	male	14	6	5	3	7	3	10	7	19	9	14	10	21	20	2	2	1	2	1	2	2	2	2	2	1	2	2	1	2	2	1	2	10	11	10
795	male	16.3719	9	9	9	9	9	9	9	15	8	12	9	36	27	2	2	2	2	2	2	2	2	2	1.37194	2	2	2	2	1	2	2	2	12	11.3719	11
796	male	17	9	9	6	6	6	10	8	18	8	10	8	30	24	3	2	2	3	2	2	2	2	3	2	2	2	2	2	2	2	2	2	14	13	12
797	male	7	9	11	4	4	4	9	6	24	16	18	12	28	19	3	2	1	3	2	2	2	3	1	1	1	2	2	1	1	3	2	1	13	10	10
798	male	15	9	9	9	9	9	9	9	17	10	13	10	36	27	3	2	2	2	2	2	2	2	1	1	3	2	2	2	2	2	2	2	13	11	12
799	male	6	9	12	11	9	9.44142	13	10	15	9	15	8	41	32.4414	3	2	1	2	1	2	3	3	3	1	2	3	3	1	1	3	1	2	11	15	11
800	male	10	15	11	6	11	10	9	9	19	14	11	8	43	28	3	2	1	3	2	1	2	3	2	2	2	2	2	1	2	2	1	2	12	13	10
801	male	10	10	13	10	12	9	15	13	22	9	14	11	45	37	2	3	1	2	1	2	2	3	3	1	2	2	2	1	2	3	1	2	11	13	11
802	male	8	12	8	12	10	12	12	12	14	12	15	9	42	36	3	2	2	3	1	1	3	3	3	1	2	2	2	1	1	2	1	2	12	14	9
803	female	11	6	9	7	10	10	10	9	17	10	12	8	32	29	2	2	1	3	1	1	2	2	1	1	2	2	2	2	1	2	2	2	10	10	11
804	female	25	4	10	5	12	7	4	15	21.7308	12	14	13	31	26	2	2	2	1	3	3	1	2	1	2	2	1	2	3	2	1	3	2	13	9	13
805	female	4	11	15	12	11	15	14	15	24	16	20	14	49	44	3	3	1	3	1	1	3	3	3	1	3	3	3	1	2	3	1	2	12	16	12
806	female	22	8	10	4	11	5	9	8	15	5	5	4	33	22	1	1	1	3	3	2	1	1	1	3	2	1	3	3	2	1	1	1	11	9	11
807	female	7	15	15	11	12	15	15	13	25	15	17	14	53	43	3	3	2	3	2	2	3	3	2	2	2	2	3	2	1	3	1	1	15	14	11
808	female	21	12	4	6	7	7	8	12	20	7	19	8	29	27	1	1	2	2	2	1	1	3	2	2	1	1	2	2	3	2	3	2	9	10	14
809	female	7	12	14	15	13	9	10	11	16	15	11	9.33135	54	30	2	3	2	3	1	1	2	3	3	1	2	3	3	3	1	3	1	1	12	14	12
810	female	7	12	12	10	10	6	11	13	18	11	19	12	44	30	2	2	2	3	1	2	3	3	2	1	2	3	3	1	2	2	1	1	12	14	10
811	female	8	7	5	12	9	12	12	14	22.2694	10	16	13	33	38	3	3	2	3	2	1	3	2	1	1	2	3	3	1	1	1	2	2	14	12	10
812	female	6	12	12	9	13	8	15	14	23	16	13	7	46	37	3	3	1	2	1	2	3	3	3	1	2	2	3	1	1	2	1	1	12	14	9
813	female	12	15	15	15	14	15	12	15	19	13	20	12	59	42	3	2	2	3	2	2	3	3	3	1	2	2	2	1	2	1	2	1	14	14	9
814	female	15	8	8	4	12	9	9	9	15	10	14	11	32	27	2	3	2	2	1	3	2	2	3	2	2	2	3	1	2	3	2	2	13	13	13
815	female	8	12	12	11	10	12	12	12	18.1418	10.9222	15.0468	10.4006	45	36	3	2	1	3	2	2	3	2	2	1	2	3	2	1	1	2	1	1	13	13	8
816	female	14	10	6	6	5	8	6	9	22	6	18	11	27	23	2	1	1	2	2	2	2	3	1	3	2	2	3	1	2	2	2	2	10	13	12
817	female	22	9	5	9	6	11	11	15	22	10	11	10	29	37	1	3	3	3	3	2	2	3	3	2	1	1	1	1	2	1	3	3	15	12	11
818	male	11	10	8	15	15	15	12	14	18	16	20	16	48	41	3	2	1	3	1	2	3	3	3	2	3	1	2	1	1	2	1	3	12	15	10
819	male	8	15	14	12	15	15	13	15	17	12	18	15	56	43	3	2	1	3	1	2	3	3	3	1	2	2	2	2	1	3	1	2	12	14	11
820	male	3	13	13	15	14	12	13	12	11	16	20	11	55	37	3	3	1	3	1	1	3	3	3	1	2	3	3	2	1	3	1	1	12	15	11
821	male	11	15	11	3	3	11	15	8	19	16	20	12	32	34	3	3	1	1	3	1	2	3	3	2	1	3	3	3	1	3	1	2	12	14	13
822	male	15	7	7	7	10	8	11	9	18	10	15	10	31	28	2	2	1	1	1	2	2	3	3	1	2	1	2	1	2	2	2	2	9	12	11
823	male	13	9	10	12	9	9	12	11	17	16	15	11	40	32	3	2	1	2	2	2	2	2	3	1	2	2	2	1	1	2	1	2	12	12	9
824	male	24	4	9	7	6	12	12	14	19	11	14	7	26	38	2	1	2	1	2	2	2	1	1	3	1	1	2	2	2	1	2	2	10	9	11
825	male	9	12	11	12	11	11	10	11	21	12	14	12	46	32	2	2	1	3	2	2	3	3	3	1	3	2	2	1	1	2	1	1	12	15	8
826	male	2	12	15	14	15	12	11	11	21	13	20	12	56	34	3	3	1	3	1	1	3	3	3	1	3	3	3	1	1	3	1	1	12	16	10
827	male	10	10	8	7	9	9	10	9	18	8	12	8	34	28	3	2	2	3	2	1	2	3	2	1	2	2	3	1	2	2	2	2	13	12	12
828	male	11	12	8	12	10	12	11	10	7	10	14	10	42	33	2	2	1	2	1	1	2	2	2	1	2	2	2	2	1	2	1	1	9	11	9
829	male	22	11	7	7	10	11	12	12	21	10	19	13	35	35	2	2	3	3	2	2	2	2	3	1	2	1	2	2	3	2	3	3	14	11	15
830	male	4	12	12	12	10	12	11	12	13	13	19	11	46	35	3	2	1	3	1	1	3	3	3	1	2	2	3	1	1	3	1	1	11	14	10
831	male	9	6	7	10	4	8	13	8	15	10	18	15	27	29	2	1	1	2	1	1	3	3	3	1	2	2	2	1	1	3	1	2	8	14	10
832	male	10	12	9	8	10	10	15	11	12	9	15	9	39	36	2	3	1	1	1	3	3	3	3	1	2	2	2	1	1	3	1	2	11	14	10
833	male	4	13	7	15	12	14	12	14	21	16	17	13	47	40	3	3	1	3	1	2	3	3	3	1	2	3	3	2	1	3	1	1	13	15	11
834	male	27	3	3	3	3	7	15	7	22	10	20	10	12	29	2	3	3	1	3	3	2	3	3	3	1	1	2	3	3	1	3	3	15	13	15
835	female	3	10	11	10	12	6	10	11	22	7	13	9	43	27	2	3	1	3	1	2	3	3	1	1	2	3	3	1	1	2	1	1	12	13	9
836	female	5	15	12	10	14	10	13	13	23	12	20	9	51	36	3	3	1	2	1	2	3	3	3	1	2	3	3	1	1	3	1	2	12	15	11
837	female	8	12	10	11	13	10	10	13	16	12	17	14	46	33	3	2	1	3	1	1	3	2	3	1	2	2	3	1	1	2	1	2	11	13	10
838	female	16	10	10	5	10	10	9	11	22	9	14	10	35	30	2	2	2	2	2	2	2	2	1	1	2	2	2	1	3	2	2	2	12	10	12
839	female	14	9	8	10	9	9	12	12	18	9	15	12	36	33	2	2	2	3	2	1	2	2	2	1	2	2	2	1	2	2	2	2	12	11	11
840	female	17	9	9	12	10	11	8	14	21	12	16	13	40	33	3	3	2	1	2	2	2	1	3	1	2	1	2	1	1	2	2	1	13	10	9
841	female	3	11	13	14	15	7	13	13	15	16	19	11.2487	53	33	3	3	1	3	1	2	3	3	3	1	3	3	3	1	1	3	1	1	13	16	10
842	female	7	9	8	8	6	6	12	13	24	9	17	13	31	31	3	3	2	3	1	2	2	3	3	1	2	2	3	1	1	2	1	1	14	13	9
843	female	3	15	12	14	15	15	10	15	21	11	19	14	56	40	3	3	1	3	1	2	3	3	3	1	3	3	3	1	1	3	1	1	13	16	10
844	female	12	15	12	9	11	7	10	11	18.0479	10.4893	15.9038	10.8047	47	28	3	3	2	3	2	2	3	3	3	1	2	2	2	1	2	1	2	2	15	14	10
845	female	8	11	10	7	11	10	11	14	21	11	19	14	39	35	2	3	2	2	2	1	2	3	2	1	2	2	2	1	1	3	1	1	12	12	9
846	female	10	10	10	9	10	9	11.222	11	15	11	14	11.024	39	31.222	2	3	1	3	3	2	3	2	3	1	2	2	3	2	1	3	1	1	14	13	11
847	female	2	13	13	14	15	10	9	13	24	5	15	10	55	32	3	3	1	3	1	1	3	3	2	1	2	3	3	2	1	3	1	1	12	14	11
848	female	7	15	14	15	13	11	13	14	16	10	12	10	57	38	3	2	1	2	1	1	3	2	2	1	3	3	2	1	1	2	1	1	10	14	8
849	female	8	10	14	9	6	10	15	11	17	11	13	10	39	36	3	3	1	2	1	2	3	2	3	1	2	3	2	1	1	3	1	2	12	14	10
850	female	32	4	7	3	7	3	7	11	22	10	17	13	21	21	1	1	3	1	3	3	1	1	1	3	2	1	1	1	3	1	3	3	12	9	12
851	female	15	10	13	7	9	11	11	12	22	14	19	13	39	34	2	2	2	3	2	2	2	3	1	2	2	2	2	2	2	2	2	3	13	12	13
852	male	5	9	11	15	11	11	14	12	14	10	16	10	46	37	3	3	1	3	1	2	3	3	3	1	2	2	3	1	1	2	1	1	13	14	9
853	male	17	8	7	7	12	7	10	4	15	10	14	10	34	21	2	2	1	1	2	2	2	2	1	2	2	2	2	2	2	2	2	2	10	11	12
854	male	5	15	15	11	11	10	15	10	10	15	18	11	52	35	3	2	1	3	1	1	3	2	3	1	2	3	3	1	1	3	1	1	11	14	10
855	male	4	11	11	9	15	15	11	14	19	14	18	11	46	40	3	3	1	3	1	2	3	3	3	1	2	3	3	1	1	2	1	1	13	15	9
856	male	4	13	12	14	12	11	11	13	15	9	16	13	51	35	3	2	1	3	1	2	3	3	2	1	3	3	3	1	1	2	1	1	12	15	9
857	male	4	10	11	12	11	9	9	11	19	13	19	9	44	29	3	3	1	3	2	2	3	3	3	1	2	3	3	1	1	3	1	1	14	15	10
858	male	14	11	8	11	7	8	8	12	18	10	18	12	37	28	2	2	1	2	2	2	3	1	2	1	2	2	1	1	1	2	1	1	11	11	7
859	male	4	13	12	9	13	11	11	10	13	16	19	10	47	32	3	3	1	3	1	2	3	3	3	1	2	3	3	2	1	3	1	1	13	15	11
860	male	17	3	4	3	7	9	15	6	17	10	17	15	17	30	1	2	1	1	1	2	1	3	2	1	1	1	2	1	2	1	1	3	8	9	10
861	male	9	15	12	6	9	9	8	10	18	13	16	9	42	27	3	3	2	1	1	1	3	3	3	1	2	3	2	2	1	2	2	1	11	15	10
862	male	4	10	6	8	7	12	5	6	17	9	17	8	31	23	3	3	1	3	1	2	3	3	2	1	2	2	3	1	1	2	1	1	13	13	9
863	male	3	12	12	14	13	11	11	12	8	7	11	6	51	34	3	3	1	3	1	1	3	3	3	1	2	2	3	1	1	3	1	1	12	14	10
864	male	9	15	12	7	14	15	15	12	25	16	19	14	48	42	3	2	1	3	1	2	2	2	3	1	2	3	3	2	1	2	1	1	12	13	10
865	male	7	9	11	7	6	6	12	10	11	4	12	6	33	28	3	3	1	2	1	2	3	2	3	1	2	3	3	1	1	3	1	2	12	14	11
866	male	9	10	12	9	12	14	13	14	23	16	17	14	43	41	3	3	1	3	1	1	3	2	3	1	2	3	2	1	2	3	3	2	12	14	13
867	male	5	14	12	11	13	11	12	13	14	11	15	9	50	36	3	3	1	2	1	1	3	2	3	1	3	3	3	1	1	3	1	1	11	15	10
868	male	12	12	13	11	12	10	10	10	17	15	20	12	48	30	2	3	2	3	2	1	3	2	3	2	2	2	3	1	2	2	2	1	13	14	11
869	male	16	8	8	4	13	14	7	15	25	13	6	11	33	36	2	2	1	2	1	1	1	1	1	1	1	1	1	1	2	3	1	3	9	6	11
870	female	10	7	9	7	8	9	11	10	23	11	20	14	31	30	3	2	2	3	2	2	3	3	2	1	2	3	3	2	2	2	2	2	14	14	13
871	female	10	12	13	9	13	12	13	12	23	12	16	9	47	37	3	3	2	2	2	2	2	3	3	1	2	2	3	2	1	3	2	1	14	13	12
872	female	11	11	12	9	11	12	10	12	19	12	15	10	43	34	2	3	1	2	1	2	2	2	3	1	2	3	3	2	1	3	2	2	11	13	13
873	female	17	9	15	3	8	8	8	15	22.2694	12	17	9	35	31	2	2	2	3	2	2	3	3	3	2	1	2	2	3	3	2	1	3	13	14	14
874	female	12	8	10	9	8	8	12	9	19	10	12	8	35	29	2	3	1	1	1	1	2	2	1	1	2	2	2	3	1	1	1	1	9	10	9
875	female	8	8	12	7	8	8	11	11	15	13	17	8	35	30	2	3	1	2	1	1	2	3	2	1	2	2	2	1	1	2	1	2	10	12	9
876	female	6	14	14	13	10	12	14	14	14	13	19	15	51	40	3	2	1	3	1	1	3	3	3	1	2	3	2	1	1	3	2	2	11	15	11
877	female	22	3	5	3	7	3	6	5	18	9	6	6	18	14	1	2	2	2	3	2	2	2	1	2	1	2	2	2	2	1	3	3	12	10	13
878	female	11.209	11	8	11	9	10	10	11	23	12	16	9	39	31	2.39476	2.32255	1.49269	2.49424	1.51207	1.80689	2.40084	2.49635	2.27983	1.37194	1.9341	2.11029	2.33998	1.50993	1.42469	2.13075	1.41213	1.58498	12.0232	12.5934	10.4025
879	female	15	12	11	7	6	12	12	10	19	8	15	12	36	34	2	2	2	3	1	2	2	2	1	2	2	2	2	1	2	1	2	2	12	11	10
880	female	15	12	12	12	9	11	12	11	20	12	18	11	45	34	2	2	2	3	1	2	2	2	3	1	2	2	3	2	2	3	2	3	12	12	15
881	female	9	8	10	6	11	10	9	11	18	5	12	8	35	30	2	2	1	3	1	1	2	2	2	1	2	2	2	1	1	2	1	1	10	11	8
882	female	14	9	4	3	3	10	4	7	17	8	11	5	19	21	3	3	2	2	1	2	2	2	3	2	2	2	3	2	2	2	2	1	13	13	12
883	female	11	12	14	13	15	12	11	15	20	16	18	14	54	38	2	3	2	3	2	2	2	3	2	1	2	2	3	1	2	2	2	2	14	12	12
884	female	13	12	3	12	12	14	12	15	12	16	20	11	39	41	3	2	1	1	1	2	2	1	1	2	2	1	3	1	1	2	1	1	10	9	9
885	female	13	10	11	10	13	12	10	12	23	12	18	12	44	34	3	2	2	3	2	3	3	3	3	2	1	3	3	2	2	2	2	2	15	15	13
886	female	19	8	15	9	11	11	11	12	23	13	20	13	43	34	2	3	2	1	2	2	2	2	2	2	1	2	2	2	2	1	2	2	12	11	11
887	male	21	12	8	6	9	8	12	14	21	12	12	4	35	34	3	2	2	1	2	2	2	1	2	2	2	1	2	1	2	2	2	3	12	10	12
888	male	9	12	13	14	13	15	11	15	15	12	18	15	52	41	3	1	3	3	2	2	3	3	3	1	2	3	3	2	1	3	1	1	14	15	11
889	male	6	14	13	8	12	12	15	14	19	14	19	16	47	41	3	2	1	2	1	2	3	3	3	1	2	3	3	1	1	3	1	2	11	15	11
890	male	24	6	8	6	6	3	10	5	19	10	12	8	26	18	1	3	2	3	3	1	2	1	3	3	1	1	1	1	3	1	2	2	13	11	10
891	male	4	15	15	14	15	11	15	12	7	7	17	10	59	38	3	3	1	3	1	1	3	2	2	1	3	3	3	1	1	2	1	1	12	14	9
892	male	14	15	13	12	11	13	10	11	22	13	18	12	51	34	2	1	1	3	2	1	2	3	3	2	2	1	2	2	1	2	1	2	10	13	10
893	male	4	6	3	15	3	6	11	5	10	12	20	7	27	22	3	3	1	3	1	1	3	2	3	1	1	3	3	1	1	3	1	1	12	13	10
894	male	7	11	12	14	13	14	14	15	23	7	13	11	50	43	3	3	1	1	1	2	3	3	3	1	2	2	3	1	1	3	1	2	11	14	11
895	male	9	12	10	8	10	11	9	8	14	10	17	12	40	28	3	1	1	3	2	2	3	3	3	1	2	2	2	1	1	3	1	2	12	14	10
896	male	8	15	14	15	15	9	10	15	25	13	20	13	59	34	3	2	2	3	1	3	3	3	3	1	3	3	2	1	1	3	2	1	14	16	10
897	male	11	9	12	9	11	7	14	9	16	10	14	9	41	30	2	3	1	3	1	2	2	2	2	1	2	2	2	2	1	2	1	2	12	11	10
898	male	12	9	8	6	6	6	9	7	15	8	11	9	29	22	2	2	1	2	1	1	2	2	1	1	1	1	2	1	1	1	1	2	9	8	8
899	male	10	12	11	5	9	7	9	11	20	8	18	12	37	27	3	2	1	3	1	2	2	3	3	2	2	2	1	1	1	3	1	2	12	14	9
900	male	14	14	14	12	15	15	15	15	14	11	19	8	55	45	2	1	1	2	1	2	2	2	1	2	2	2	1	1	1	2	1	2	9	11	8
901	male	9	8	12	13	9	9	14	15	25	7	18	11	42	38	3	3	2	3	2	2	3	2	3	1	2	3	3	1	1	1	1	1	15	14	8
902	male	14	15	11	5	10	13	11	8	12	16	20	16	41	32	2	2	1	1	1	2	2	2	3	1	2	3	1	1	2	3	1	2	9	13	10
903	male	15	7	8	11	9	11	9	12	21	10	17	11	35	32	2	2	2	2	2	2	3	3	2	2	2	2	2	2	2	2	2	2	12	14	12
904	male	21	9	9	10	6	11	10	9	21	6	15	14	34	30	2	1	2	3	3	3	3	3	3	2	1	1	2	3	3	2	2	2	14	13	14
905	female	17	9	9	9	6	12	14	12	19	15	9	11	33	38	2	2	2	3	1	2	2	2	3	1	1	1	2	2	2	2	2	2	12	10	12
906	female	14	9	8	12	9	9	11	13	24	8	16	13	38	33	3	1	2	3	2	3	3	3	2	2	2	2	3	2	2	2	2	2	14	14	13
907	female	5	11	8	6	8	8	8	7	19	12	15	12	33	23	3	3	1	3	1	3	3	3	2	1	2	2	3	2	1	3	1	1	14	13	11
908	female	14	8	5	10	11	9	12	9	17	9	20	12	34	30	2	2	2	3	2	3	2	3	2	2	1	2	1	2	1	2	1	1	14	12	8
909	female	16	9	8	6	9	6	8	10	19	11	15	12	32	24	2	2	2	2	2	2	2	2	1	2	2	2	3	2	2	2	2	2	12	11	13
910	female	5	7	8	10	11	9	13	15	24	12	11	6	36	37	2	3	2	2	1	1	3	3	1	1	2	2	3	1	1	2	1	1	11	12	9
911	female	16	7	3	10	6	8	12	13	28	15	20	14	26	33	2	2	2	2	2	3	3	2	3	2	1	2	3	1	2	3	2	2	13	13	13
912	female	11	12	12	10	14	14	10	15	21	15	19	14	48	39	3	3	3	3	2	2	2	3	3	1	2	2	2	1	2	3	1	2	16	13	11
913	female	19	8	7	6	7	5	8	8	19	8	11	11	28	21	2	2	2	2	2	2	2	2	2	2	2	2	2	2	2	1	2	2	12	12	11
914	female	3	12	13	15	14	12	12	15	17	10	19	12	54	39	3	3	1	3	1	2	3	3	3	1	2	3	3	1	1	3	1	1	13	15	10
915	female	10	8	7	5	7	10	13	11	19	8	17	8	27	34	3	3	1	3	2	3	3	2	2	1	2	2	2	2	1	2	1	1	15	12	9
916	female	4	15	14	10	15	15	15	14	14	16	17	14	54	44	3	3	2	3	1	2	3	3	3	1	3	3	3	1	1	3	1	1	14	16	10
917	female	3	12	11	10	13	12	12	11	7	12	15	8	46	35	3	2	1	3	1	1	3	3	3	1	2	3	3	1	1	3	1	1	11	15	10
918	female	19	9	13	9	12	10	9	13	20	12	20	12	43	32	2	1	2	3	2	2	2	2	3	1	2	1	3	2	2	1	2	2	12	11	12
919	female	15	9	7	7	8	9	9	10	16	10	12	9	31	28	2	2	1	2	2	1	2	2	2	1	2	2	2	2	2	2	2	2	10	11	12
920	female	11	11	13	8	15	13	11	15	23	13	20	8	47	39	3	2	2	3	2	2	2	2	1	2	3	3	3	2	2	3	2	1	14	13	13
921	male	7	13	11	10	12	9	12	13	18	14	14	10	46	34	3	2	1	3	1	2	3	3	3	1	2	3	2	1	1	1	1	1	12	15	7
922	male	5	14	10	3	11	6	9	7	22	14	18	12	38	22	2	3	1	3	1	1	3	3	2	1	2	2	2	1	1	2	1	1	11	13	8
923	male	5	11	13	15	10	12	12	11	16	14	20	16	49	35	3	3	1	3	1	2	3	3	3	1	2	3	3	2	1	3	1	2	13	15	12
924	male	13	9	6	7	6	7	9	7	21	12	15	10	28	23	2	3	1	2	1	2	2	2	1	1	1	2	1	1	2	1	1	2	11	9	8
925	male	12	12	13	9	9	11	12	10	19	10	16	13	43	33	2	2	1	2	2	2	3	2	3	1	2	2	2	1	1	3	1	2	11	13	10
926	male	11	6	8	9	11	9	9	9	17	15	20	12	34	27	3	2	1	2	1	2	2	2	2	1	2	2	2	1	1	2	1	2	11	11	9
927	male	15	14	6	12	4	5	10	6	14	15	19	9	36	21	1	2	1	2	1	2	2	2	3	1	3	2	2	2	1	3	1	3	9	13	12
928	male	12	14	11	11	7	11	12	11	21	11	14	11	43	34	2	2	1	1	1	1	2	2	2	1	2	2	2	1	1	2	1	2	8	11	9
929	male	22	3	3	3	5	3	9	5	9	10	5	4	14	17	2	1	1	2	3	2	1	1	1	3	1	1	1	1	2	1	1	1	11	8	7
930	male	7	15	15	14	15	15	15	11	13	16	17	16	59	41	3	2	1	3	1	2	3	2	3	1	2	3	3	1	1	2	1	1	12	14	9
931	male	13	5	6	6	5	7	12	7	10	10	16	8	22	26	2	2	1	2	1	1	2	2	3	1	1	1	2	1	1	2	1	2	9	10	9
932	male	23	11	7	6	9	12	11	12	25	14	19	16	33	35	2	2	2	1	2	2	1	2	1	1	2	1	2	2	3	1	3	3	11	8	14
933	male	22	6	8	6	7	10	12	10	24	9	15	11	27	32	2	2	2	2	2	2	1	2	2	2	1	1	1	2	2	1	2	2	12	9	10
934	male	12	12	12	7	9	9	11	12	18	12	15	9	40	32	2	2	1	2	1	2	2	2	3	1	2	2	2	2	1	3	1	1	10	12	10
935	male	19	10	11	10	9	11	11	9	14	8	14	10	40	31	2	2	2	3	3	2	2	3	3	2	2	2	1	2	2	2	2	3	14	14	12
936	male	18	8	9	12	9	9	7	10	19	7	12	10	38	26	2	2	1	1	2	2	2	2	3	2	2	2	3	2	2	2	2	2	10	13	13
937	female	11	6	9	8	6	8	12	13	19	10	20	11	29	33	2	3	2	3	2	2	3	3	2	2	2	3	3	2	2	2	2	2	14	15	13
938	female	22	8	9	8	10	11	8	12	23	8	13	9	35	31	1	2	2	1	2	2	2	3	2	3	1	1	2	2	3	1	2	2	10	12	12
939	female	12	6	11	9	7	10	8	15	17	10	15	12	33	33	2	2	1	3	2	2	2	2	2	2	1	2	2	1	1	2	1	1	12	11	8
940	female	3	12	12	10	12	14	11	12	15	16	18	14	46	37	3	3	1	3	2	1	3	3	3	1	2	3	3	1	1	3	1	1	13	15	10
941	female	22	12	9	9	13	12	10	11	21	14	20	12	43	33	2	2	2	3	3	2	2	2	2	3	1	1	2	2	3	2	3	2	14	11	14
942	female	16	10	11	9	11	10	10	12	20	9	10	7	41	32	2	2	2	3	2	2	2	3	3	2	2	2	2	1	2	2	2	3	13	14	12
943	female	5	11	10	12	9	9	9	11	16	11	18	11	42	29	2	3	1	3	1	2	3	3	2	1	2	2	3	1	1	2	1	1	12	13	9
944	female	12	12	7	8	7	9	12	11	21.7308	7	14	8	34	32	2	3	1	2	2	2	2	2	2	1	2	1	3	1	1	2	1	2	12	10	10
945	female	15	11	12	5	10	11	10	12	23	12	15	13	38	33	2	2	2	2	2	2	2	3	2	1	1	2	2	1	2	1	2	2	12	11	10
946	female	4	13	11	11	9	8	12	15	17	16	18	12	44	35	3	3	1	3	2	2	3	3	1	1	2	3	3	2	1	3	1	2	14	13	12
947	female	24	11	9	6	5	10	8	8	18	13	16	10	31	26	2	1	2	2	2	3	2	2	2	2	2	1	1	2	2	2	3	3	12	11	13
948	female	8	11	12	14	12	12	10	12	22	11	16	10	49	34	2	2	1	2	1	1	3	2	2	1	2	2	3	1	1	2	1	1	9	12	9
949	female	18	6	7	5	5	10	8	9	20	11	13	10	23	27	2	2	2	2	2	2	2	2	2	2	2	2	2	2	2	2	2	2	12	12	12
950	female	13	9	12	11	10	10	8	10	21	16	15	11	42	28	3	2	2	3	2	2	3	3	1	1	2	2	2	1	2	1	3	3	14	12	12
951	female	17	12	12	15	6	11	12	13	15	11	17	15	45	36	2	2	1	3	2	2	2	2	3	2	1	2	1	2	1	2	2	2	12	12	10
952	male	10	3	3	3	3	3	7	3	7	4	5	4	12	13	3	3	3	3	3	1	3	3	1	1	1	2	2	2	2	1	1	1	16	11	9
953	female	10	3	4	3	3	3	10	8	12	13	12	7.55603	13	21	3	1	2	3	1	2	2	2	1	1	3	2	3	2	1	3	1	2	12	11	12
954	female	13	10	10	7	12	12	11	13	25	12	20	10	39	36	3	2	2	3	2	2	2	3	3	2	2	2	2	2	1	2	2	1	14	14	10
955	male	21.3719	10	7	6	11	11	7	15	13	4	5	4	34	33	1	2	2	3	3	3	2	3	3	1.37194	2	2	1	3	2	2	3	2	14	13.3719	13
956	male	7	13	12	12	14	15	11	12	27	16	20	16	51	38	3	3	2	3	2	2	3	3	3	1	3	3	2	2	1	3	1	1	15	16	10
957	male	7	7	13	8	12	6	10	11	18	12	13	13	40	27	2	3	1	3	1	1	3	3	1	3	1	2	2	1	1	1	1	1	11	13	7
958	male	4	10	10	10	10	10	9	10	18	11	11	8	40	29	3	3	1	2	1	2	3	3	2	2	2	3	3	1	1	3	1	1	12	15	10
959	male	13	11	9	6	9	10	10	14	17	10	13	10	35	34	2	3	1	1	1	3	2	3	1	1	3	3	2	3	3	1	1	1	11	13	11
960	male	12.3719	12	8	9	10	9	8	9	15	8	14	8	39	26	3	3	2	3	2	2	3	2	1	1.37194	2	3	2	3	2	2	2	2	15	12.3719	13
961	male	10	10	10	9	9	9	11	9	7	12	15	10	38	29	2	2	1	2	2	2	2	3	1	1	2	2	2	1	1	2	1	2	11	11	9
962	male	16	3	7	3	3	3	7	3	7	4	6	6	16	13	3	1	1	3	3	2	1	1	1	1	3	2	3	3	1	3	1	3	13	9	14
963	male	6	15	7.5162	6	6	5	9	6	25	12	16	14	34.5162	20	2	3	1	3	1	1	3	3	2	1	2	2	2	1	1	2	1	2	11	13	9

## Sheet: Sheet2
sex	sex
1	male
1	male
1	male
1	male
1	male
1	male
1	male
1	male
1	male
1	male
0	female
0	female
0	female
0	female
0	female
0	female
0	female
0	female
1	male
1	male
1	male
1	male
1	male
1	male
1	male
1	male
1	male
1	male
1	male
1	male
1	male
0	female
0	female
0	female
0	female
0	female
0	female
0	female
0	female
0	female
0	female
0	female
0	female
0	female
0	female
1	male
1	male
1	male
1	male
1	male
1	male
1	male
1	male
1	male
1	male
1	male
0	female
0	female
0	female
0	female
0	female
0	female
0	female
0	female
0	female
0	female
0	female
0	female
0	female
1	male
1	male
1	male
1	male
1	male
1	male
1	male
1	male
1	male
1	male
1	male
1	male
1	male
0	female
0	female
0	female
0	female
0	female
0	female
0	female
0	female
0	female
0	female
0	female
0	female
0	female
1	male
1	male
1	male
1	male
1	male
1	male
1	male
1	male
1	male
1	male
1	male
1	male
1	male
0	female
0	female
0	female
0	female
0	female
0	female
0	female
0	female
0	female
0	female
0	female
0	female
0	female
1	male
1	male
1	male
1	male
1	male
1	male
1	male
1	male
1	male
1	male
1	male
1	male
1	male
1	male
1	male
0	female
0	female
0	female
0	female
0	female
0	female
0	female
0	female
0	female
0	female
0	female
1	male
1	male
1	male
1	male
1	male
1	male
1	male
1	male
1	male
1	male
1	male
1	male
1	male
1	male
0	female
0	female
0	female
0	female
0	female
0	female
0	female
0	female
0	female
0	female
0	female
0	female
1	male
1	male
1	male
1	male
1	male
1	male
1	male
1	male
1	male
1	male
1	male
1	male
1	male
1	male
1	male
1	male
0	female
0	female
0	female
0	female
0	female
0	female
0	female
0	female
0	female
0	female
0	female
0	female
1	male
1	male
1	male
1	male
1	male
1	male
1	male
1	male
1	male
1	male
1	male
1	male
1	male
1	male
1	male
0	female
0	female
0	female
0	female
0	female
0	female
0	female
0	female
0	female
0	female
0	female
0	female
1	male
1	male
1	male
1	male
1	male
1	male
1	male
1	male
1	male
1	male
1	male
1	male
1	male
1	male
1	male
0	female
0	female
0	female
0	female
0	female
0	female
0	female
0	female
0	female
0	female
0	female
0	female
0	female
1	male
1	male
1	male
1	male
1	male
1	male
1	male
1	male
1	male
0	female
0	female
0	female
0	female
0	female
0	female
0	female
0	female
0	female
0	female
0	female
0	female
1	male
1	male
1	male
1	male
1	male
1	male
1	male
1	male
1	male
1	male
1	male
1	male
1	male
0	female
0	female
0	female
0	female
0	female
0	female
0	female
0	female
0	female
0	female
0	female
0	female
0	female
0	female
0	female
0	female
1	male
1	male
1	male
1	male
1	male
1	male
1	male
1	male
1	male
1	male
1	male
1	male
1	male
0	female
0	female
0	female
0	female
0	female
0	female
0	female
0	female
0	female
0	female
0	female
0	female
0	female
0	female
0	female
0	female
1	male
1	male
1	male
1	male
1	male
1	male
1	male
1	male
1	male
1	male
1	male
1	male
1	male
0	female
0	female
0	female
0	female
0	female
0	female
0	female
0	female
0	female
0	female
0	female
0	female
0	female
0	female
0	female
0	female
0	female
1	male
1	male
1	male
1	male
1	male
1	male
1	male
1	male
1	male
1	male
1	male
0	female
0	female
0	female
0	female
0	female
0	female
0	female
0	female
0	female
0	female
0	female
0	female
0	female
0	female
0	female
0	female
1	male
1	male
1	male
1	male
1	male
1	male
1	male
1	male
1	male
1	male
1	male
1	male
1	male
1	male
1	male
0	female
0	female
0	female
0	female
0	female
0	female
0	female
0	female
0	female
0	female
0	female
0	female
0	female
0	female
0	female
0	female
0	female
1	male
1	male
1	male
1	male
1	male
1	male
1	male
1	male
1	male
1	male
1	male
1	male
1	male
1	male
1	male
1	male
1	male
0	female
0	female
0	female
0	female
0	female
0	female
0	female
0	female
0	female
0	female
0	female
0	female
1	male
1	male
1	male
1	male
1	male
1	male
1	male
1	male
1	male
1	male
1	male
1	male
1	male
1	male
1	male
1	male
0	female
0	female
0	female
0	female
0	female
0	female
0	female
0	female
0	female
0	female
0	female
0	female
0	female
1	male
1	male
1	male
1	male
1	male
1	male
1	male
1	male
1	male
1	male
1	male
1	male
1	male
1	male
1	male
1	male
1	male
0	female
0	female
0	female
0	female
0	female
0	female
0	female
0	female
0	female
0	female
0	female
0	female
0	female
0	female
0	female
0	female
1	male
1	male
1	male
1	male
1	male
1	male
1	male
1	male
1	male
1	male
1	male
1	male
1	male
1	male
1	male
0	female
0	female
0	female
0	female
0	female
0	female
0	female
0	female
0	female
0	female
0	female
0	female
0	female
0	female
1	male
1	male
1	male
1	male
1	male
1	male
1	male
1	male
1	male
1	male
1	male
1	male
1	male
1	male
1	male
0	female
0	female
0	female
0	female
0	female
0	female
0	female
0	female
0	female
0	female
0	female
0	female
0	female
0	female
0	female
1	male
1	male
1	male
1	male
1	male
1	male
1	male
1	male
1	male
1	male
1	male
1	male
1	male
1	male
1	male
0	female
0	female
0	female
0	female
0	female
0	female
0	female
0	female
0	female
0	female
0	female
0	female
0	female
0	female
0	female
1	male
1	male
1	male
1	male
1	male
1	male
1	male
1	male
1	male
1	male
1	male
1	male
1	male
1	male
1	male
0	female
0	female
0	female
0	female
0	female
0	female
0	female
0	female
0	female
0	female
0	female
0	female
0	female
0	female
0	female
1	male
1	male
1	male
1	male
1	male
1	male
1	male
1	male
1	male
1	male
1	male
1	male
1	male
1	male
1	male
1	male
0	female
0	female
0	female
0	female
0	female
0	female
0	female
0	female
0	female
0	female
0	female
0	female
0	female
0	female
0	female
1	male
1	male
1	male
1	male
1	male
1	male
1	male
1	male
1	male
1	male
1	male
1	male
1	male
1	male
1	male
0	female
0	female
0	female
0	female
0	female
0	female
0	female
0	female
0	female
0	female
0	female
0	female
0	female
1	male
1	male
1	male
1	male
1	male
1	male
1	male
1	male
1	male
1	male
1	male
1	male
1	male
1	male
1	male
1	male
0	female
0	female
0	female
0	female
0	female
0	female
0	female
0	female
0	female
0	female
0	female
0	female
0	female
0	female
0	female
1	male
1	male
1	male
1	male
1	male
1	male
1	male
1	male
1	male
1	male
1	male
1	male
1	male
1	male
1	male
0	female
0	female
0	female
0	female
0	female
0	female
0	female
0	female
0	female
0	female
0	female
0	female
0	female
0	female
1	male
1	male
1	male
1	male
1	male
1	male
1	male
1	male
1	male
1	male
1	male
1	male
1	male
1	male
1	male
1	male
1	male
0	female
0	female
0	female
0	female
0	female
0	female
0	female
0	female
0	female
0	female
0	female
0	female
0	female
0	female
0	female
0	female
1	male
1	male
1	male
1	male
1	male
1	male
1	male
1	male
1	male
1	male
1	male
1	male
1	male
1	male
1	male
1	male
0	female
0	female
0	female
0	female
0	female
0	female
0	female
0	female
0	female
0	female
0	female
0	female
0	female
0	female
0	female
1	male
1	male
1	male
1	male
1	male
1	male
1	male
1	male
1	male
1	male
1	male
1	male
1	male
1	male
1	male
1	male
1	male
0	female
0	female
0	female
0	female
0	female
0	female
0	female
0	female
0	female
0	female
0	female
0	female
0	female
0	female
0	female
0	female
0	female
1	male
1	male
1	male
1	male
1	male
1	male
1	male
1	male
1	male
1	male
1	male
1	male
1	male
1	male
1	male
1	male
1	male
1	male
0	female
0	female
0	female
0	female
0	female
0	female
0	female
0	female
0	female
0	female
0	female
0	female
0	female
0	female
0	female
0	female
0	female
1	male
1	male
1	male
1	male
1	male
1	male
1	male
1	male
1	male
1	male
1	male
1	male
1	male
1	male
1	male
1	male
1	male
1	male
0	female
0	female
0	female
0	female
0	female
0	female
0	female
0	female
0	female
0	female
0	female
0	female
0	female
0	female
0	female
0	female
1	male
1	male
1	male
1	male
1	male
1	male
1	male
1	male
1	male
1	male
1	male
1	male
1	male
1	male
1	male
1	male
0	female
0	female
0	female
0	female
0	female
0	female
0	female
0	female
0	female
0	female
0	female
0	female
0	female
0	female
0	female
1	male
0	female
0	female
1	male
1	male
1	male
1	male
1	male
1	male
1	male
1	male
1	male
